# Supplementary material for: Synthesis, Biological Evaluation, and Molecular Docking Studies of Novel Isatin-Thiazole Derivatives as α-Glucosidase Inhibitors
Source: Molecules. 2017 Apr 20;22(4):659. doi: 10.3390/molecules22040659 (PMC6154535; doi:10.3390/molecules22040659)
Supplement: Supplementary file 1 [file molecules-22-00659-s001.pdf]

## **Supplemental Materials**

### **Synthesis, biological evaluation and molecular docking studies of novel isatin-thiazole derivatives as $\alpha$ -glucosidase inhibitors**

ZhenZhen Xie, Guangcheng Wang\*, Jing Wang, Ming Chen, Yaping Peng, Luyao Li,  
Bing Deng, Shan Chen, Wenbiao Li

College of Chemistry and Chemical Engineering, Hunan Engineering Laboratory for  
Analyse and Drugs Development of Ethnomedicine in Wuling Mountains, Jishou  
University, Jishou 416000, PR China

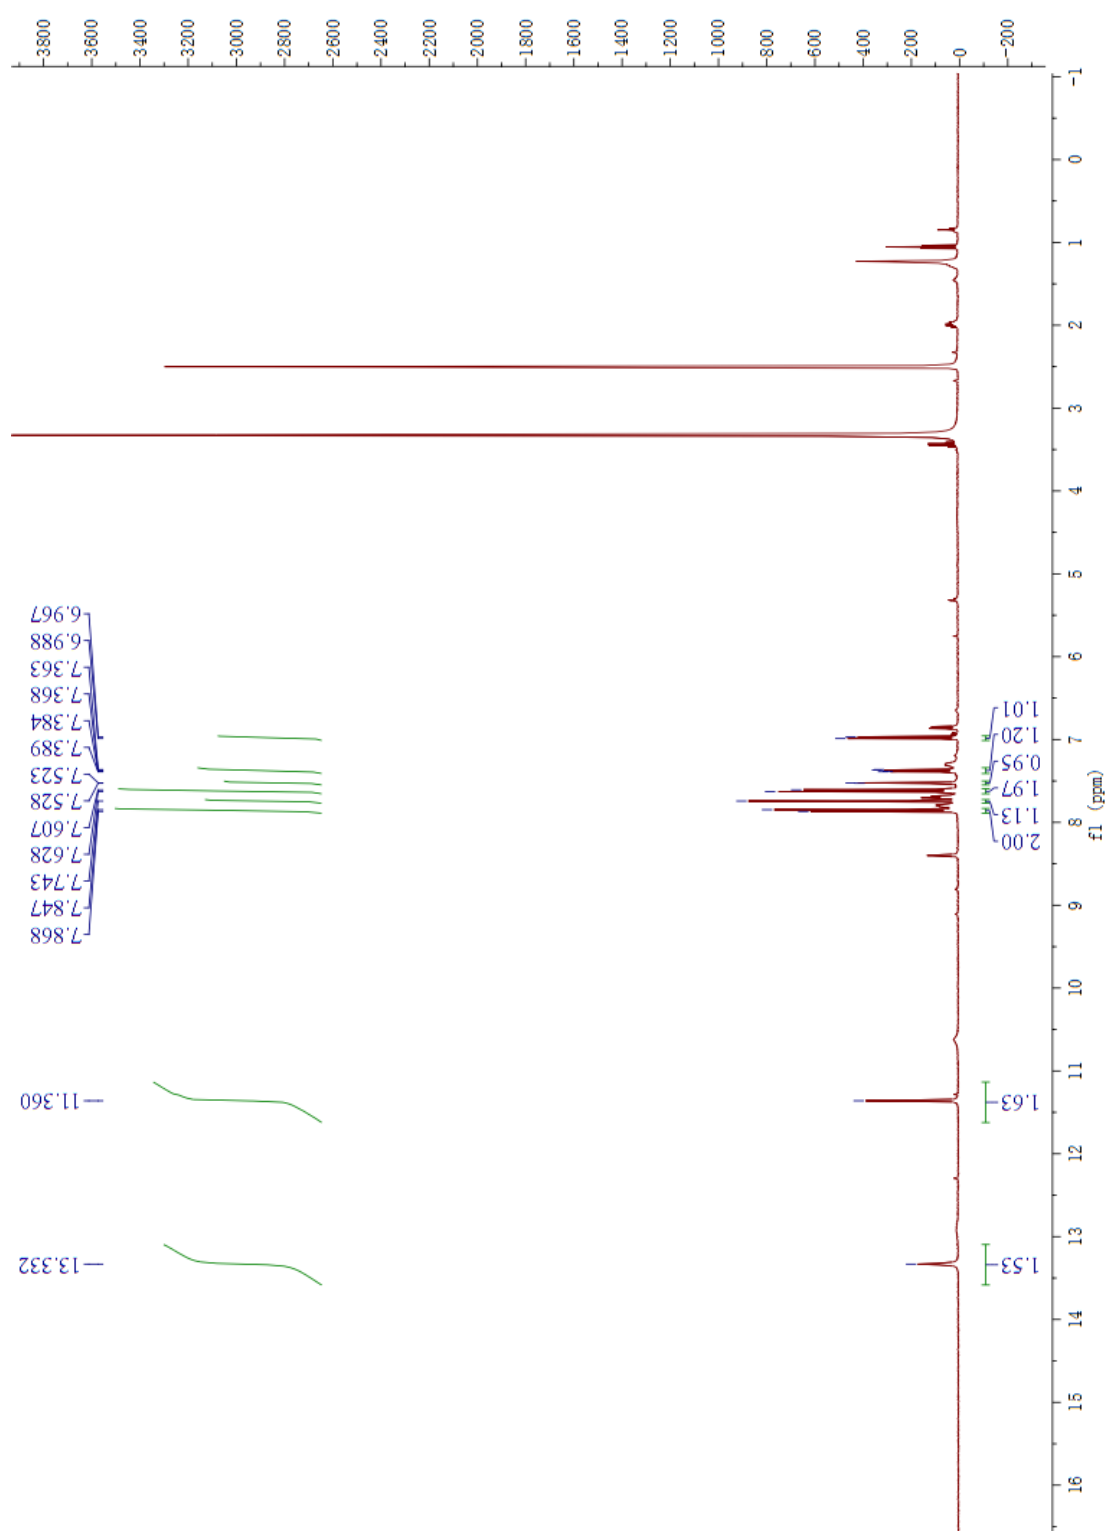

**Figure S 1:** <sup>1</sup>H NMR of Compound **6a**

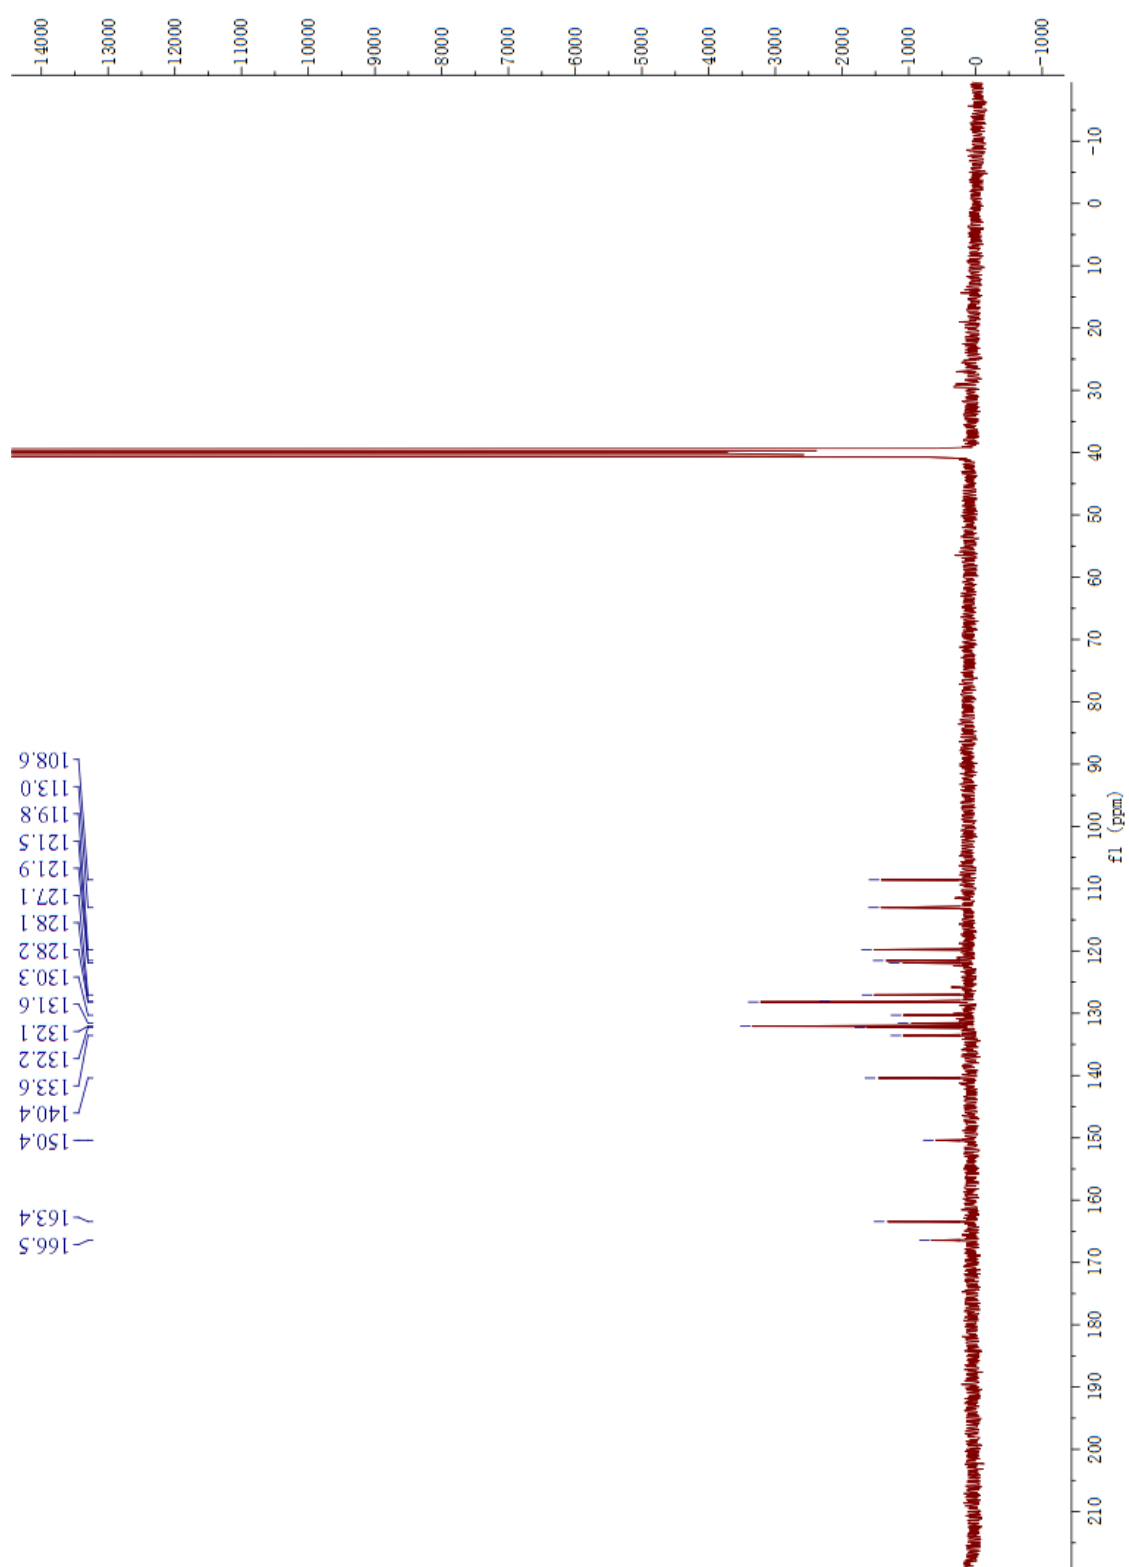

**Figure S 2:**  $^{13}\text{C}$  NMR of Compound 6a

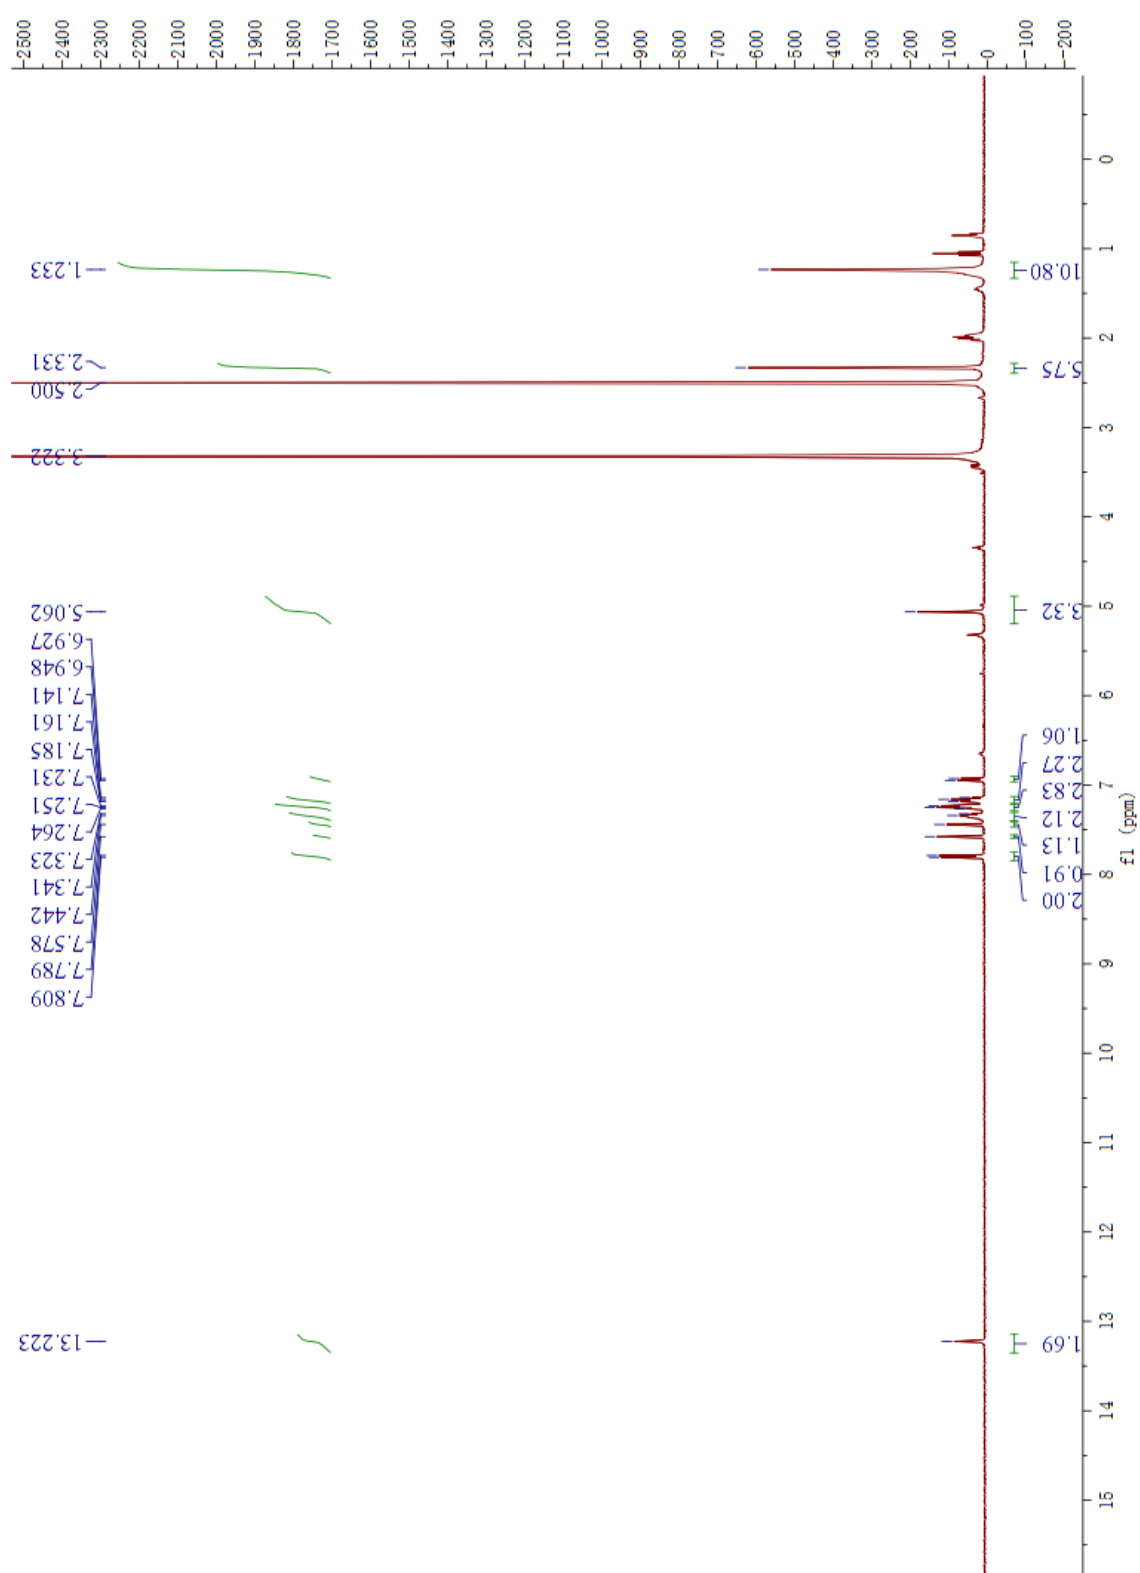

**Figure S 3:** <sup>1</sup>H NMR of Compound **6b**

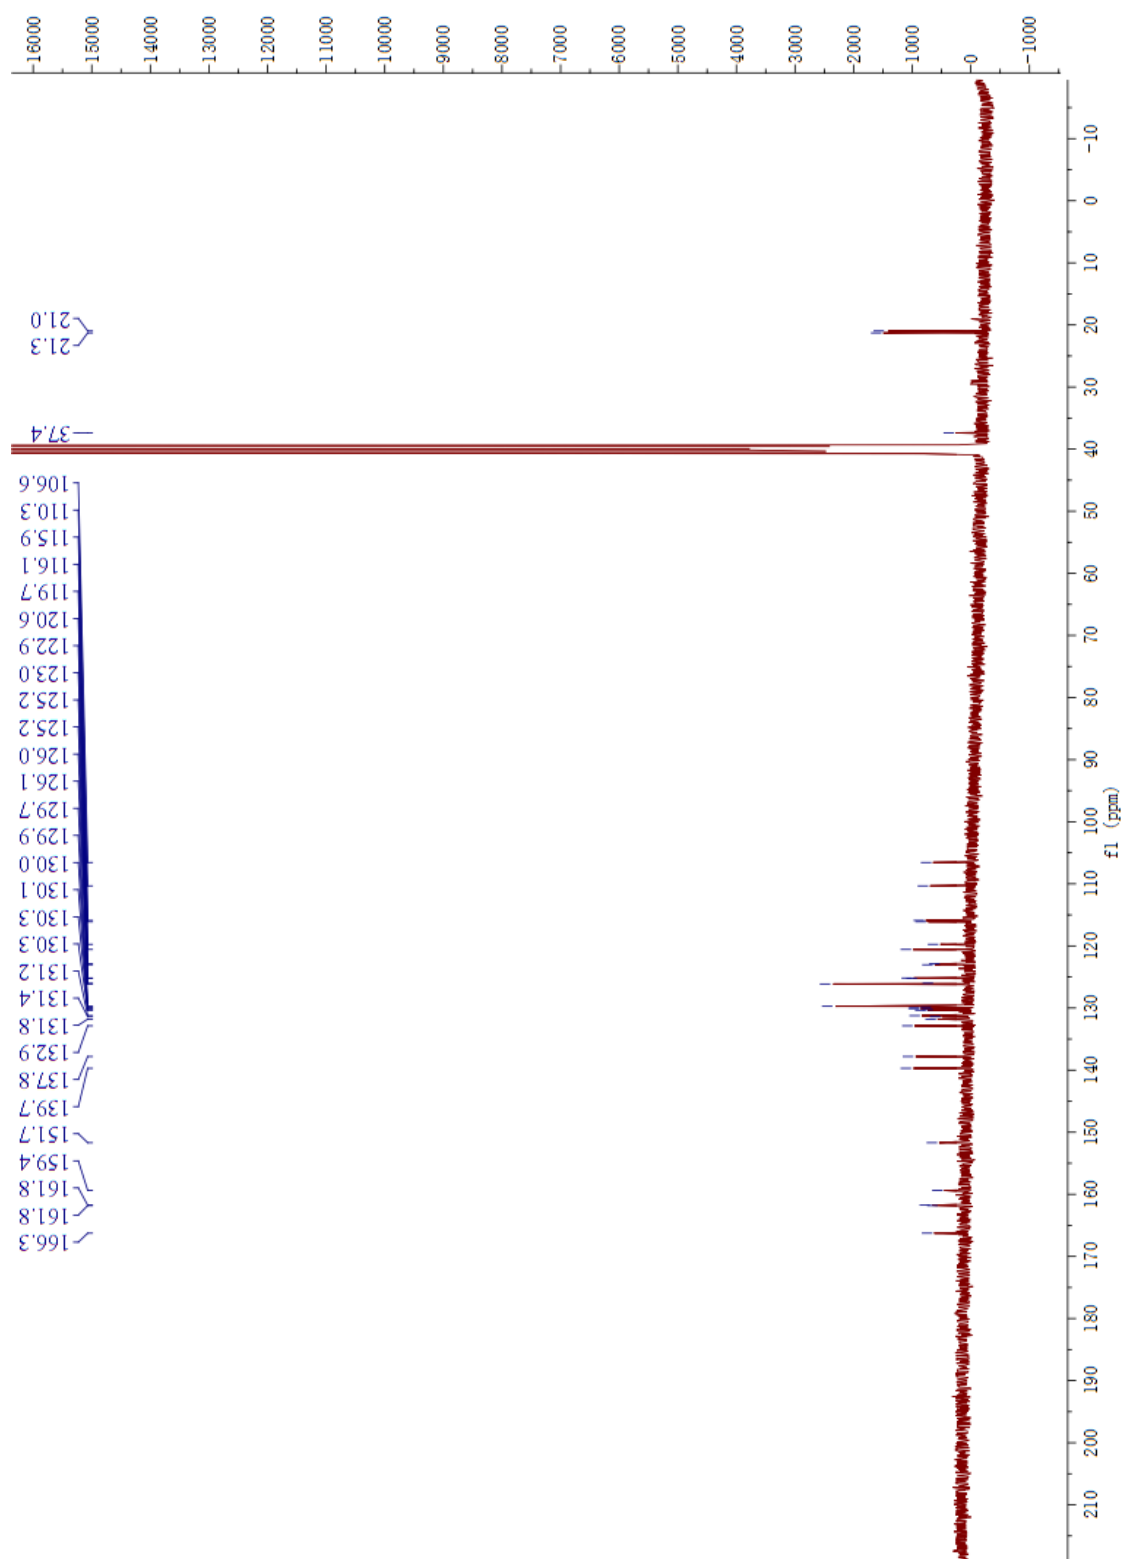

**Figure S 4:**  $^{13}\text{C}$  NMR of Compound **6b**

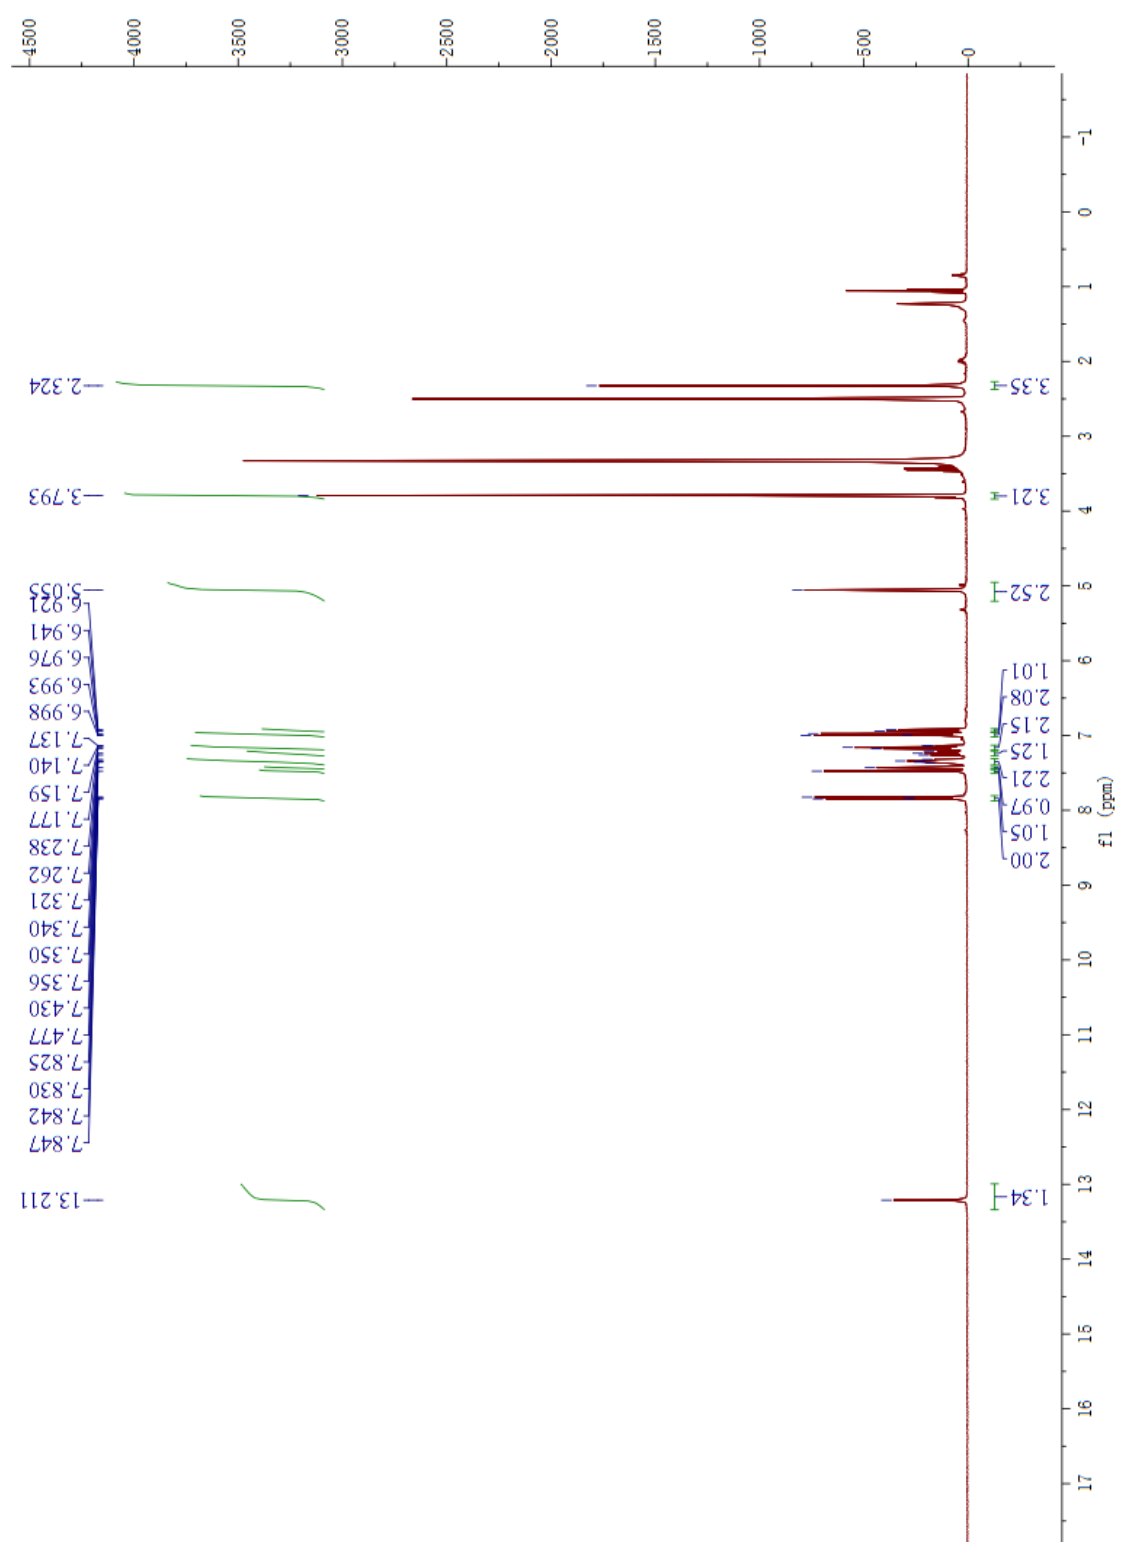

**Figure S 5:** <sup>1</sup>H NMR of Compound 6c

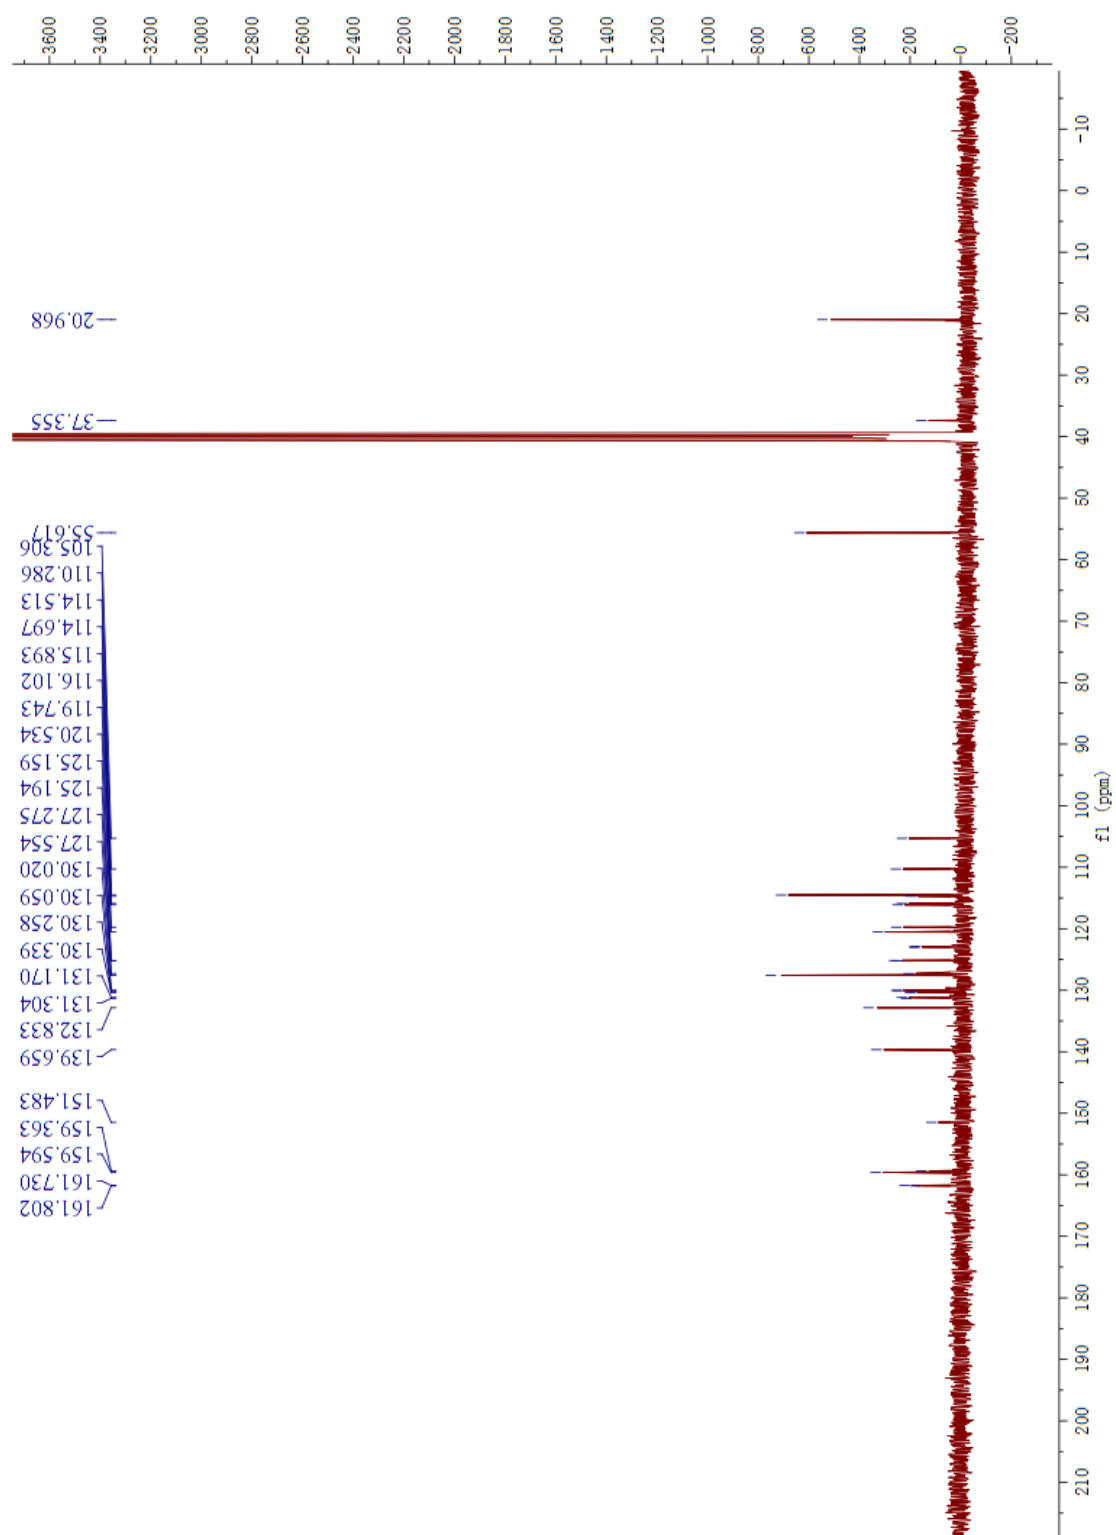

**Figure S 6:**  $^{13}\text{C}$  NMR of Compound 6c

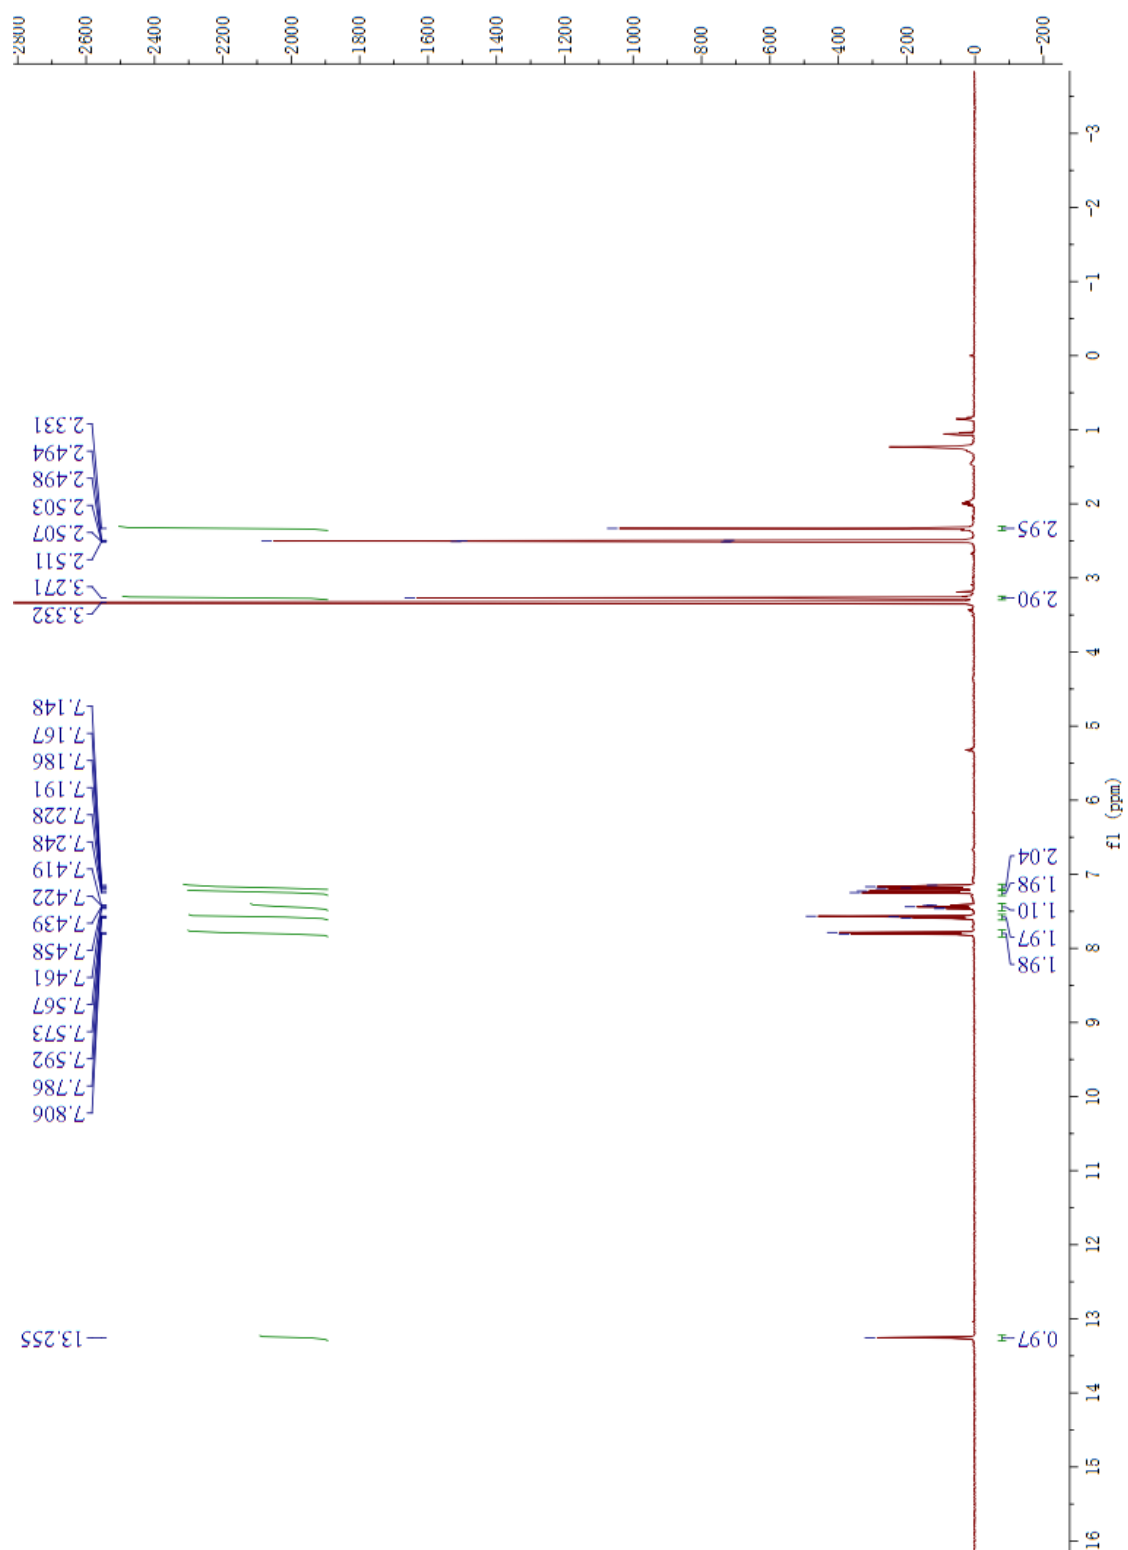

**Figure S 7:** <sup>1</sup>H NMR of Compound **6d**

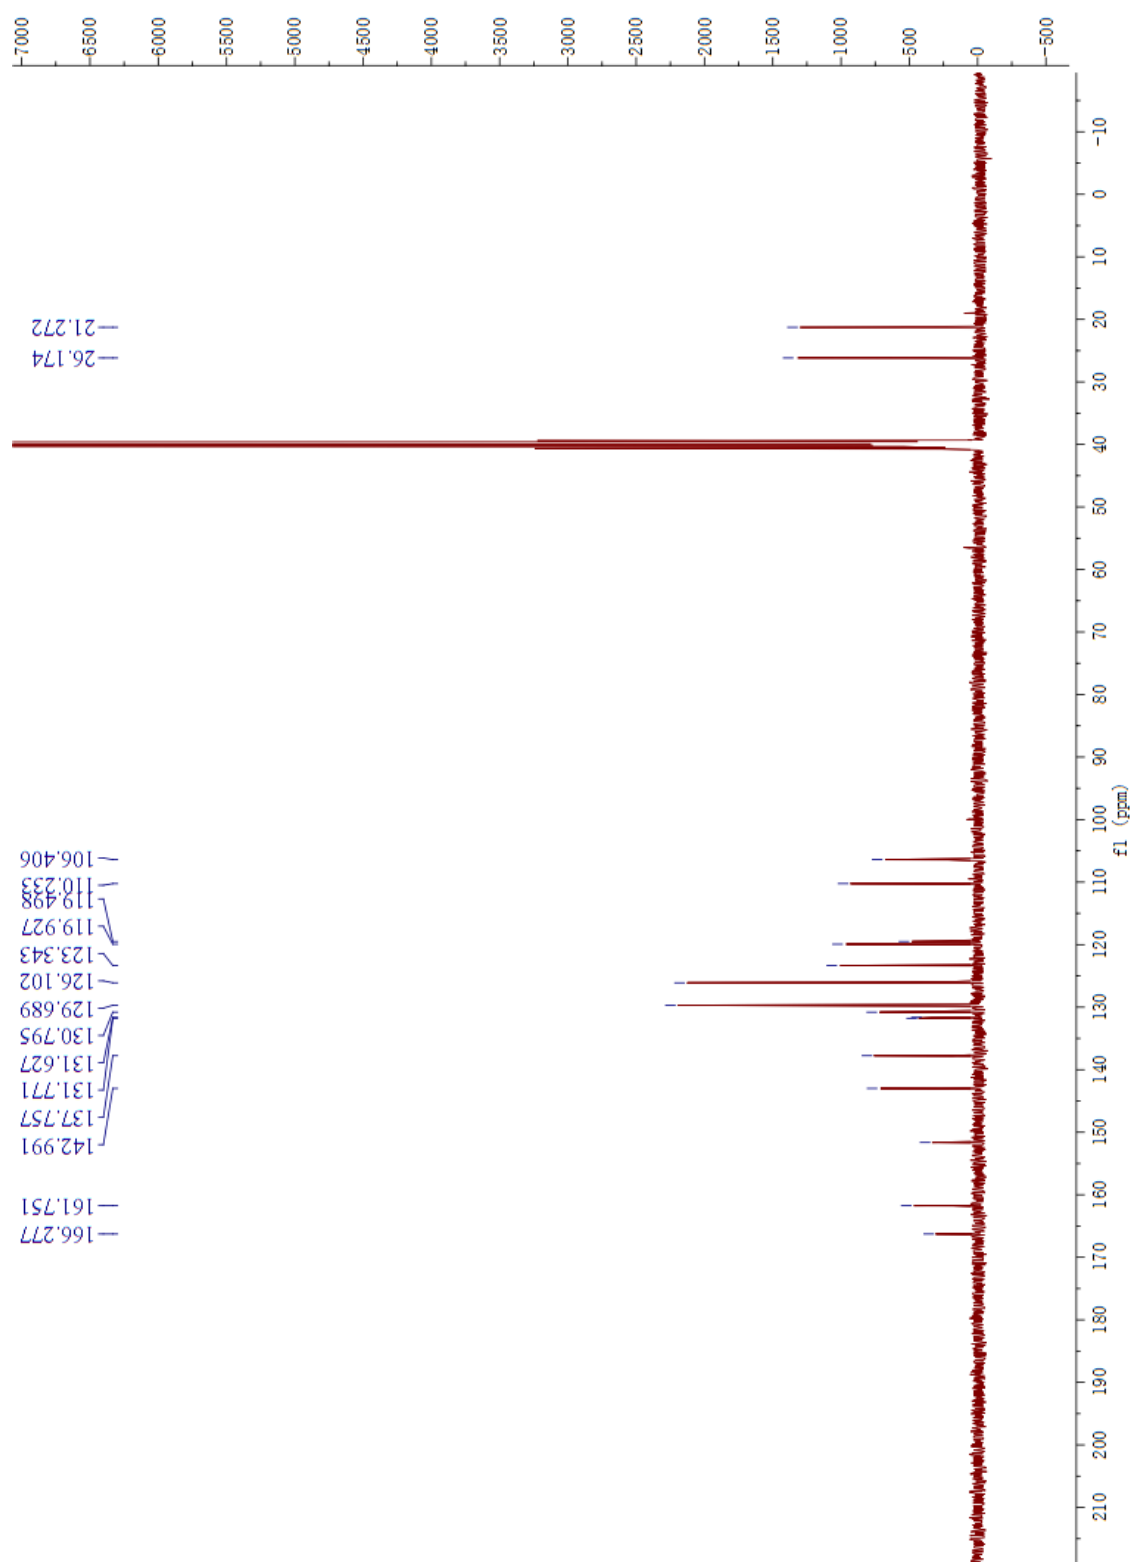

**Figure S 8:** <sup>13</sup>C NMR of Compound 6d

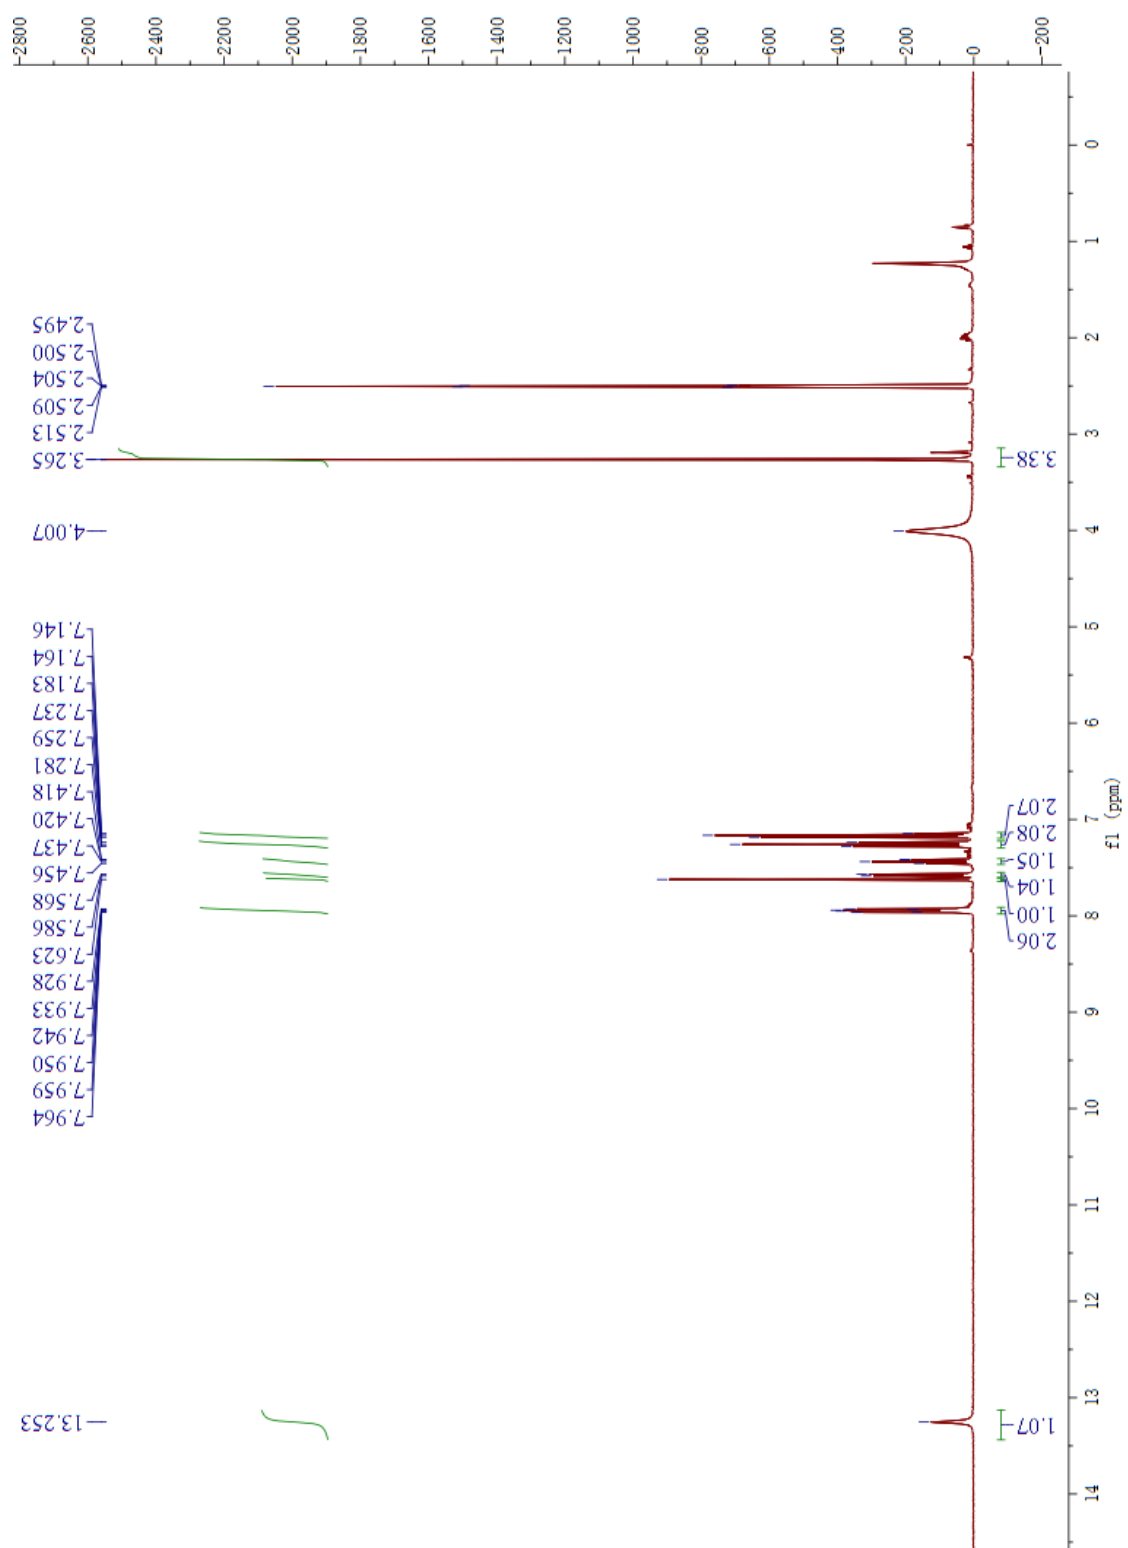

**Figure S 9:** <sup>1</sup>H NMR of Compound **6e**

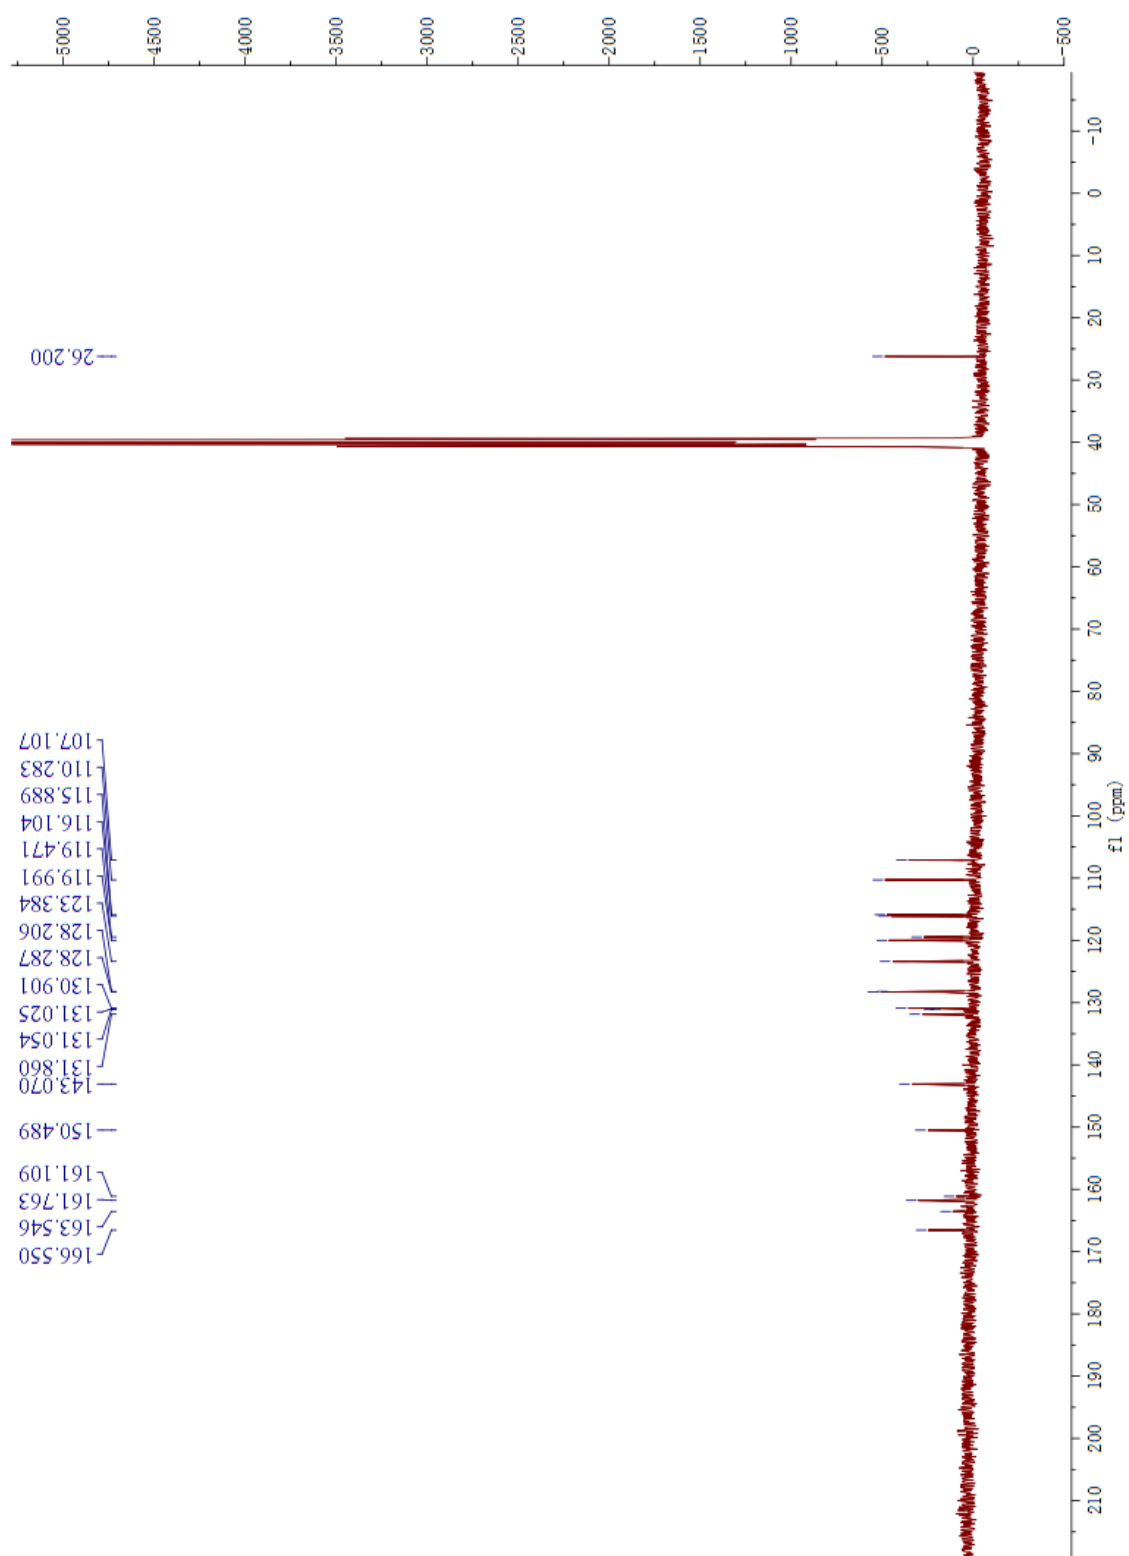

**Figure S 10:**  $^{13}\text{C}$  NMR of Compound **6e**

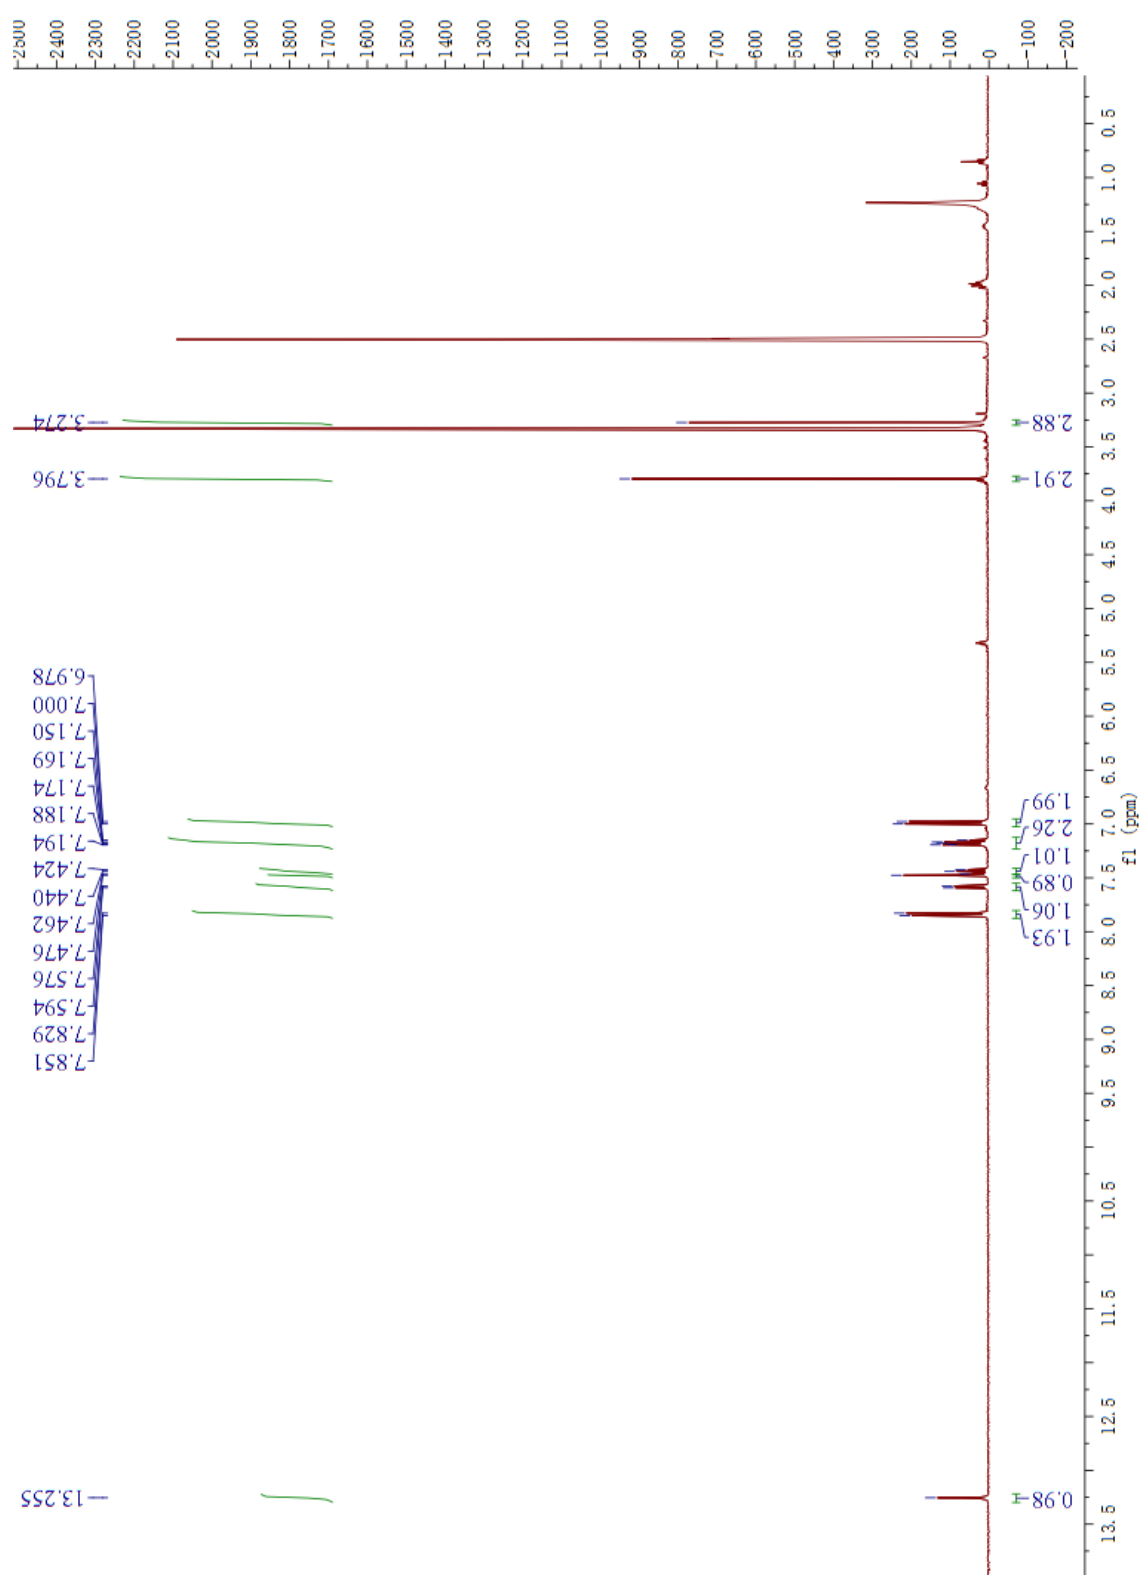

**Figure S 11:** <sup>1</sup>H NMR of Compound **6f**

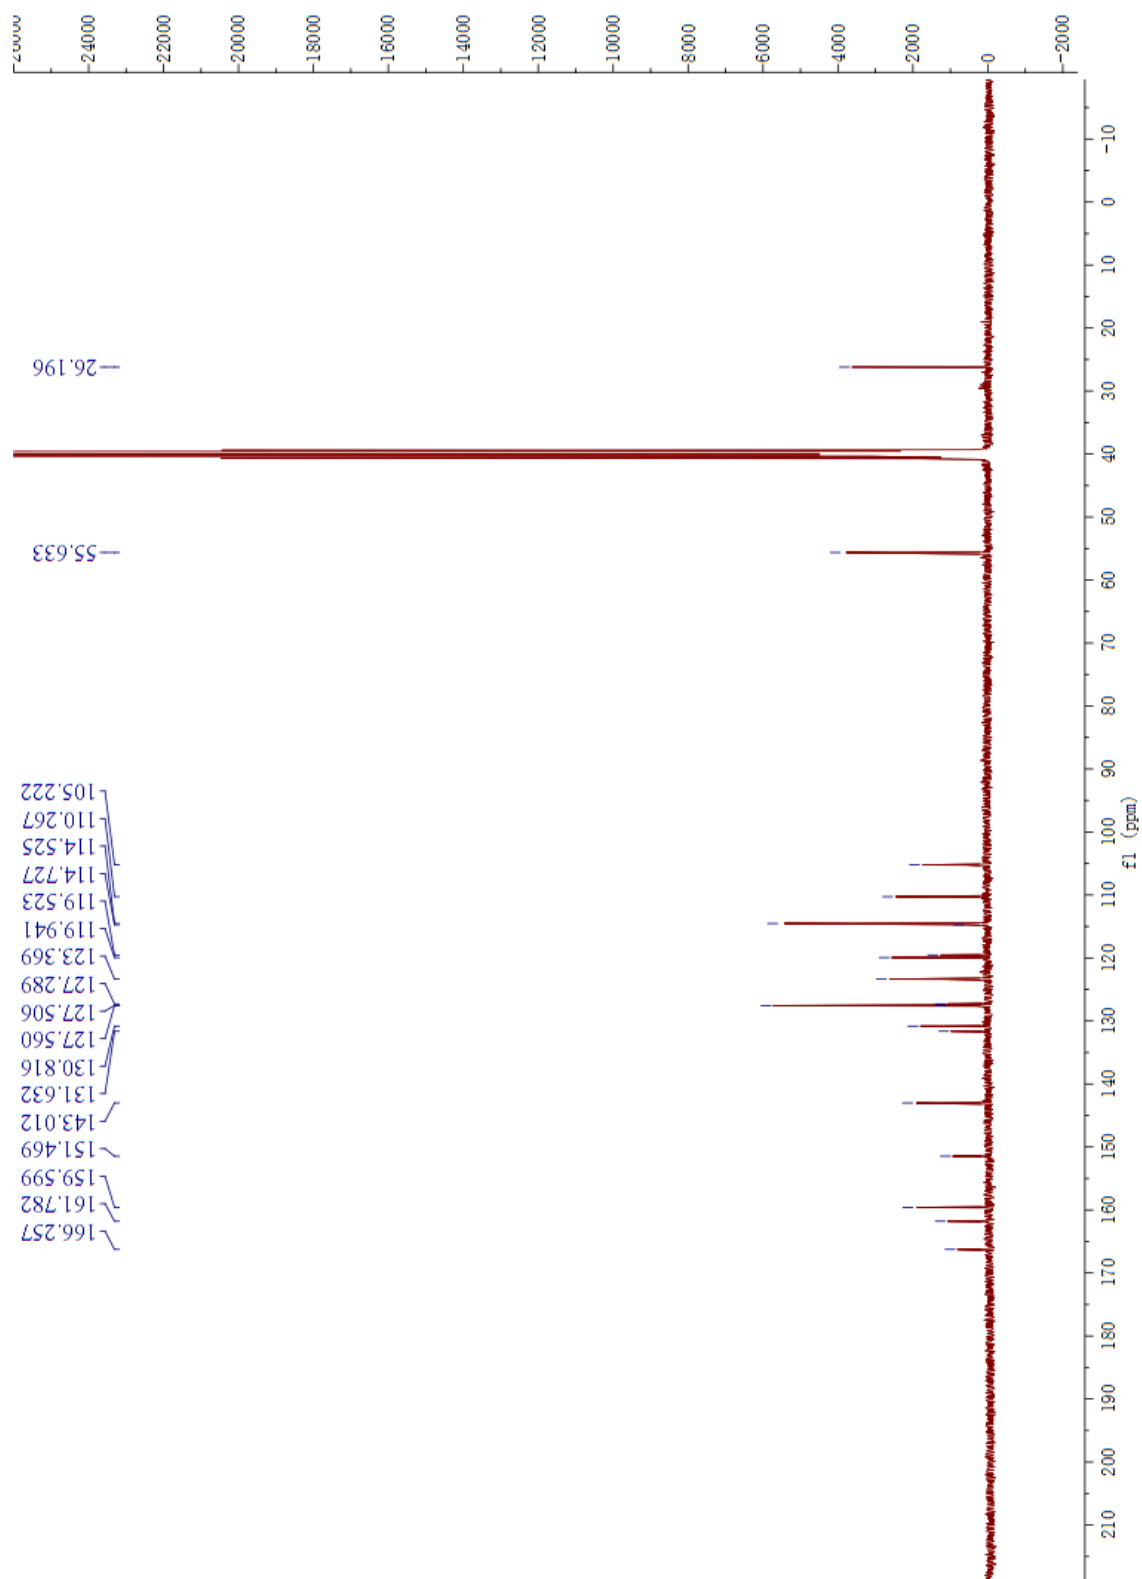

**Figure S 12:**  $^{13}\text{C}$  NMR of Compound 6f



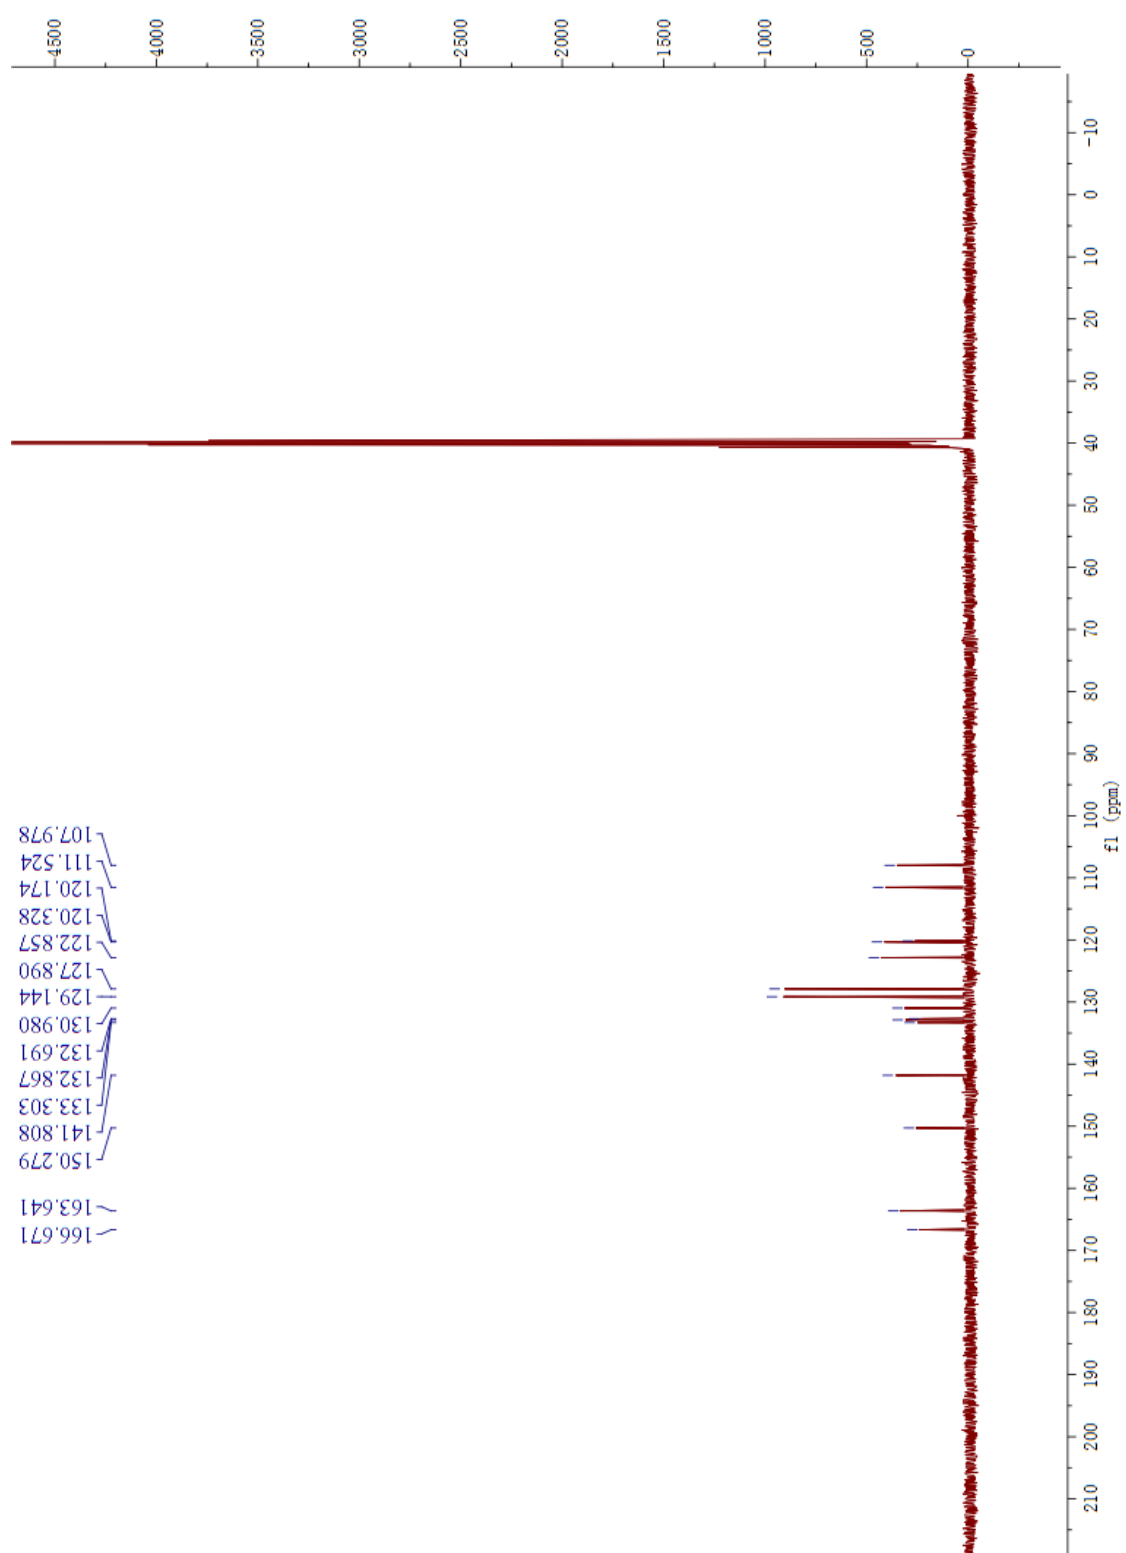

**Figure S 14:**  $^{13}\text{C}$  NMR of Compound **6g**

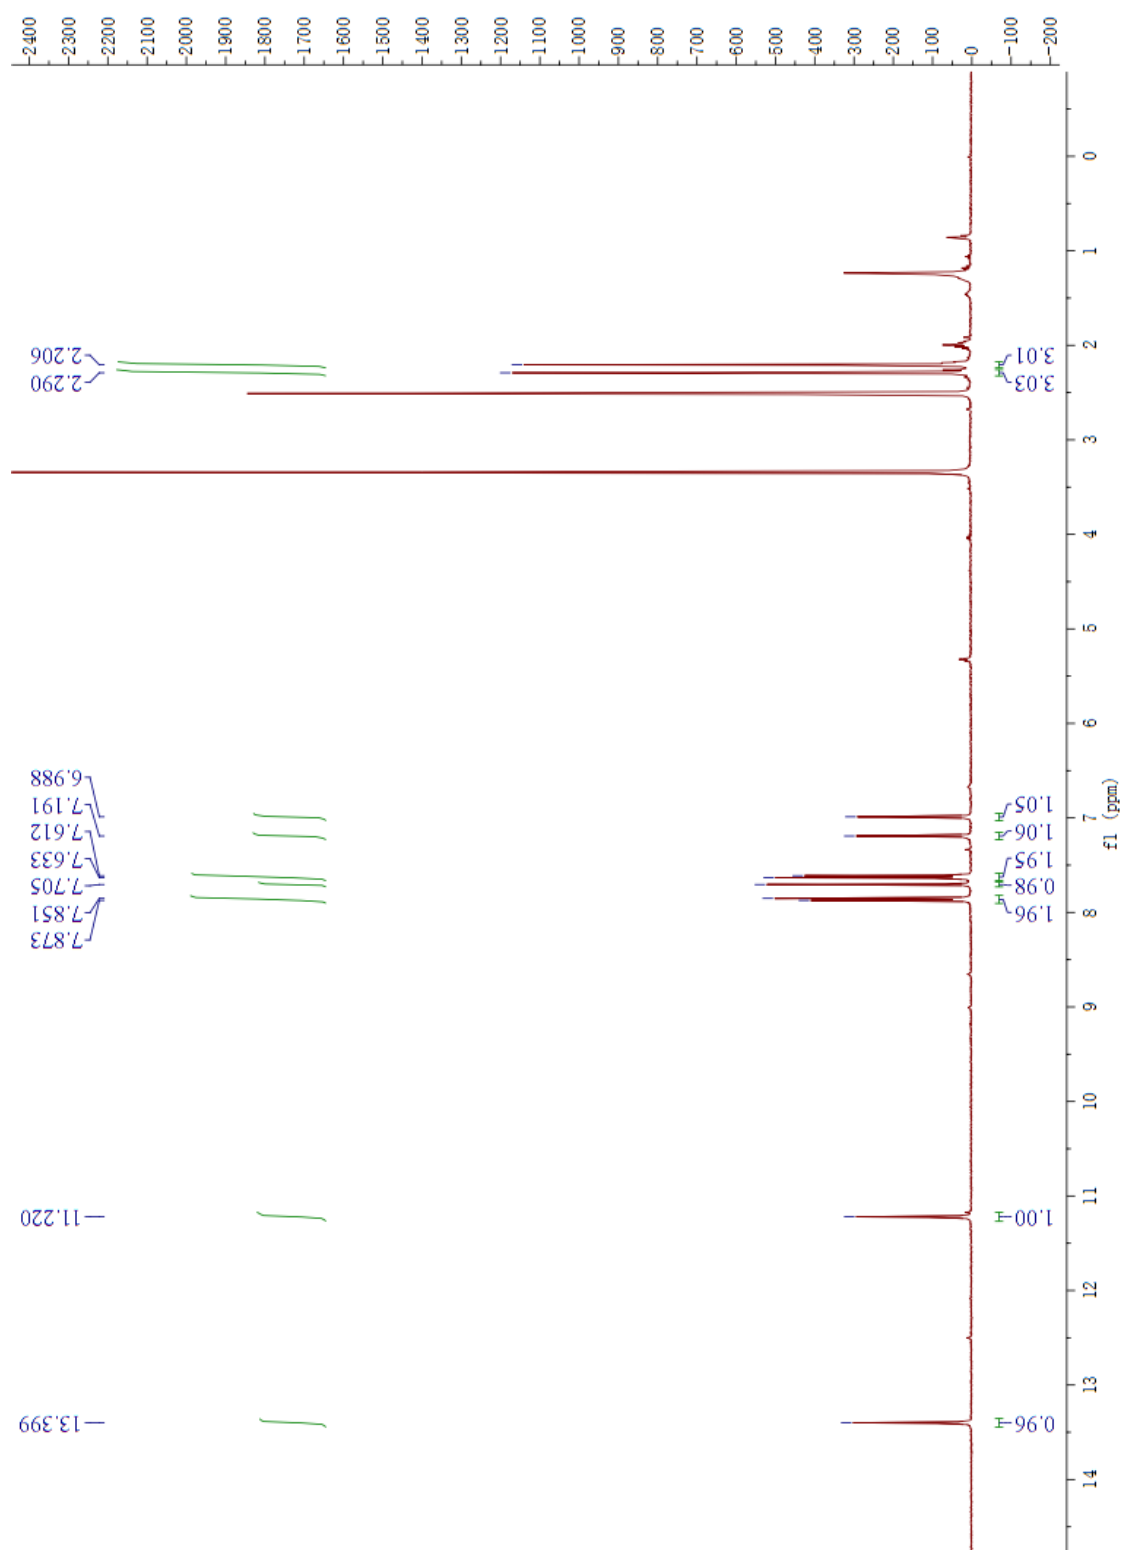

**Figure S 15:** <sup>1</sup>H NMR of Compound **6h**

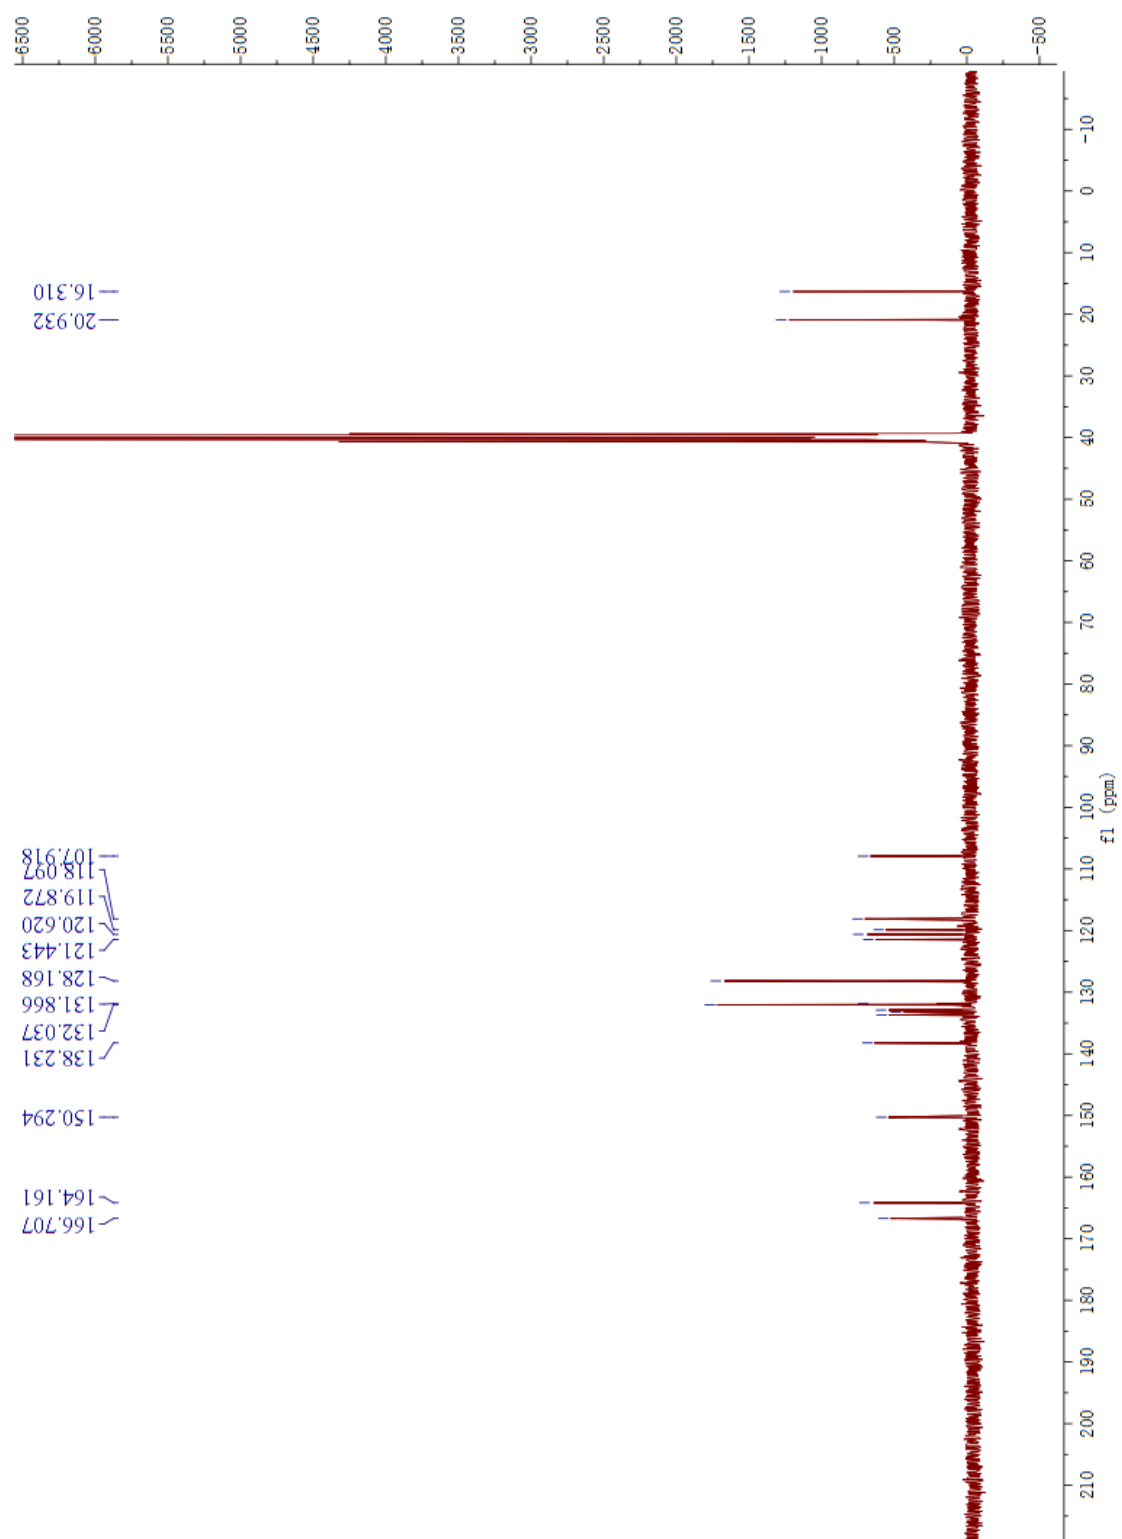

**Figure S 16:**  $^{13}\text{C}$  NMR of Compound **6h**

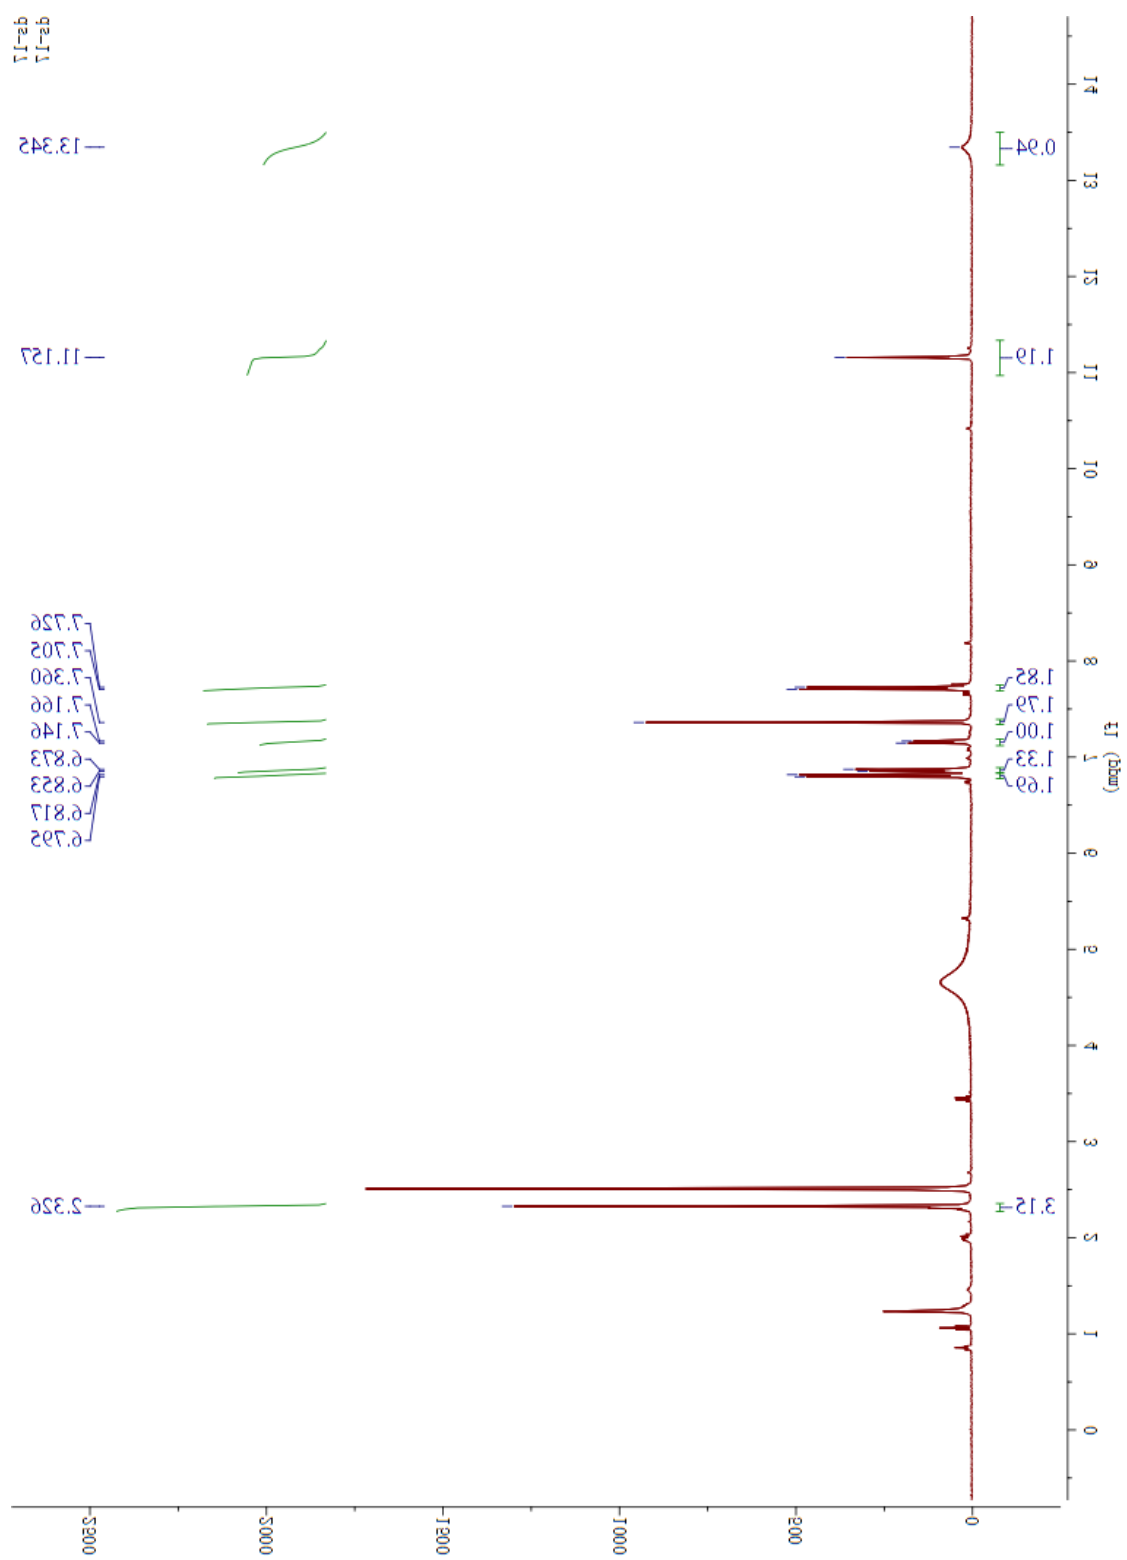

**Figure S 17:** <sup>1</sup>H NMR of Compound **6i**

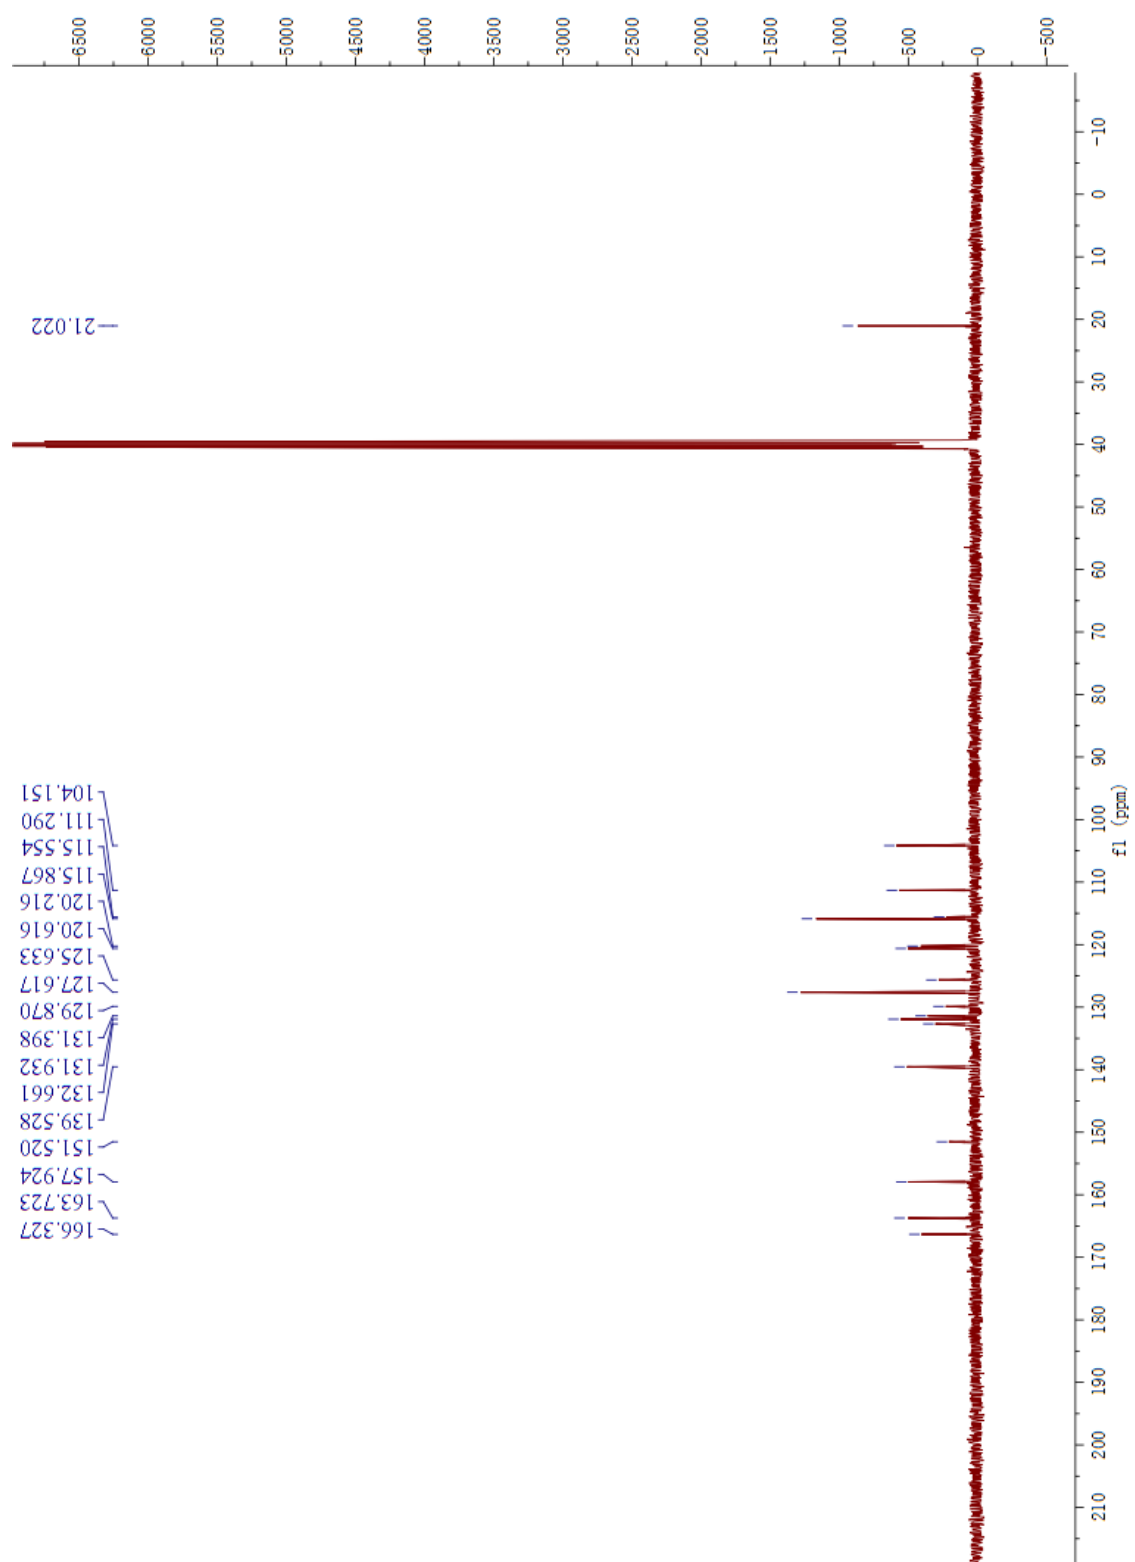

**Figure S 18:**  $^{13}\text{C}$  NMR of Compound 6i

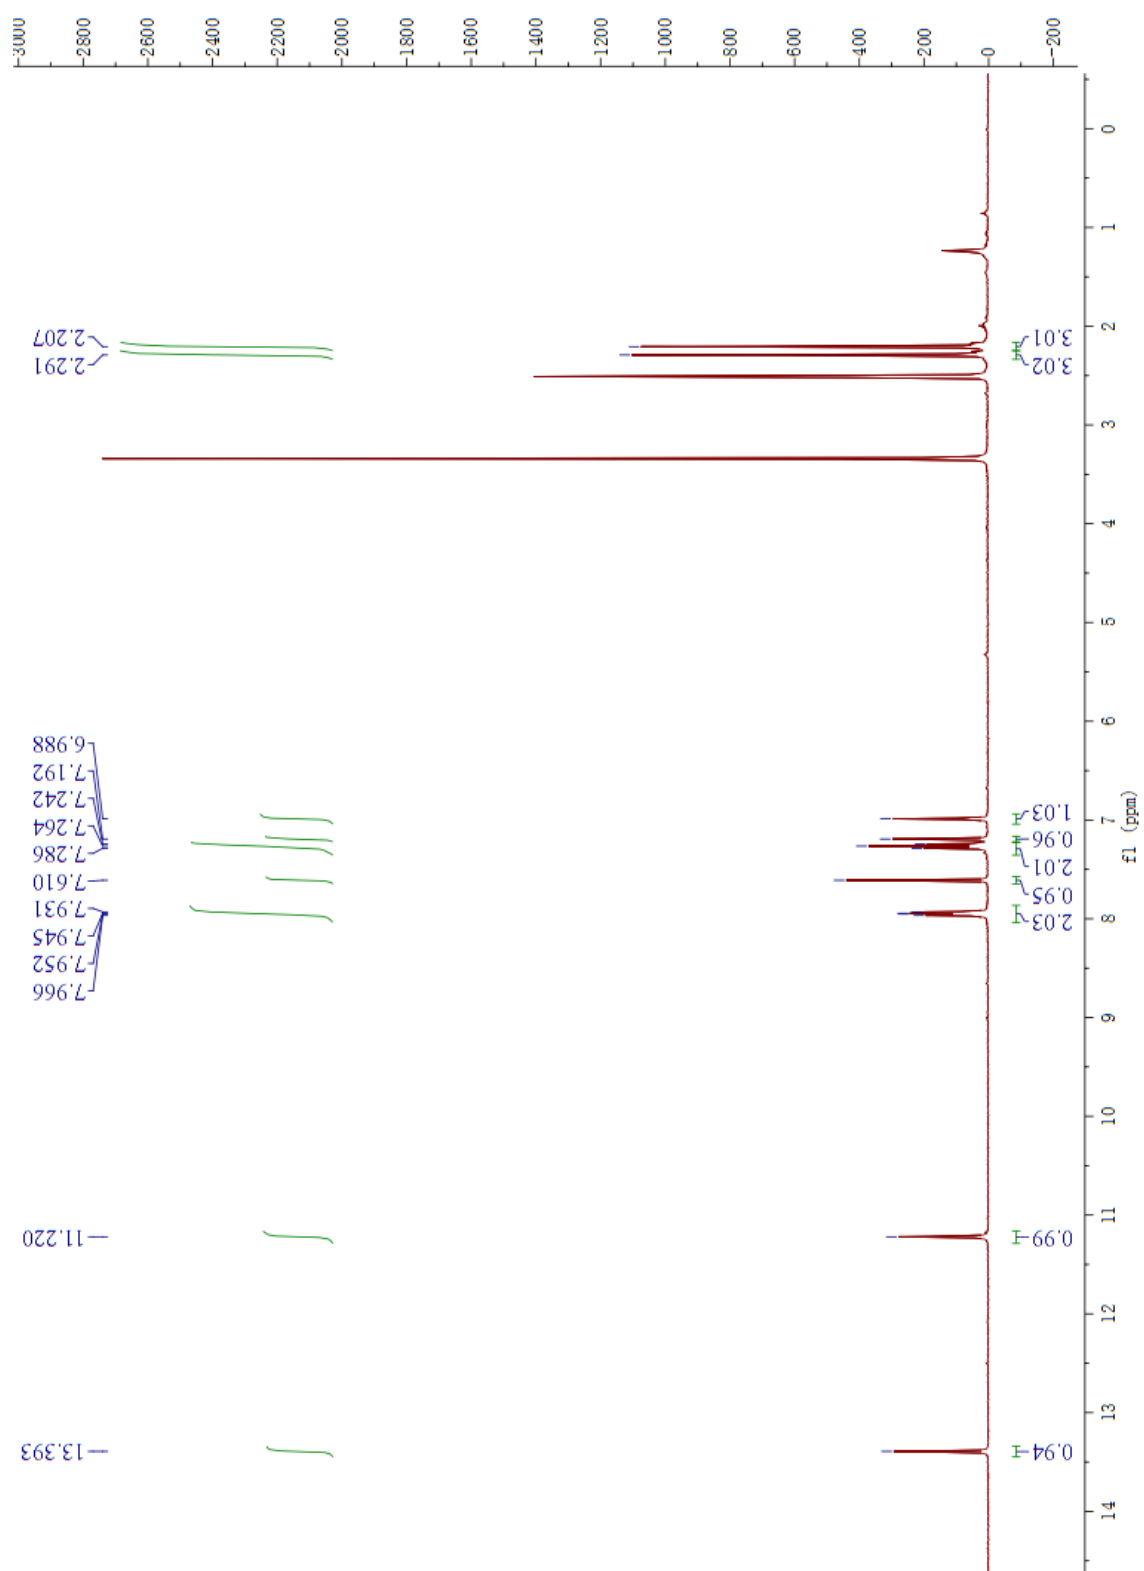

**Figure S 19:** <sup>1</sup>H NMR of Compound **6j**

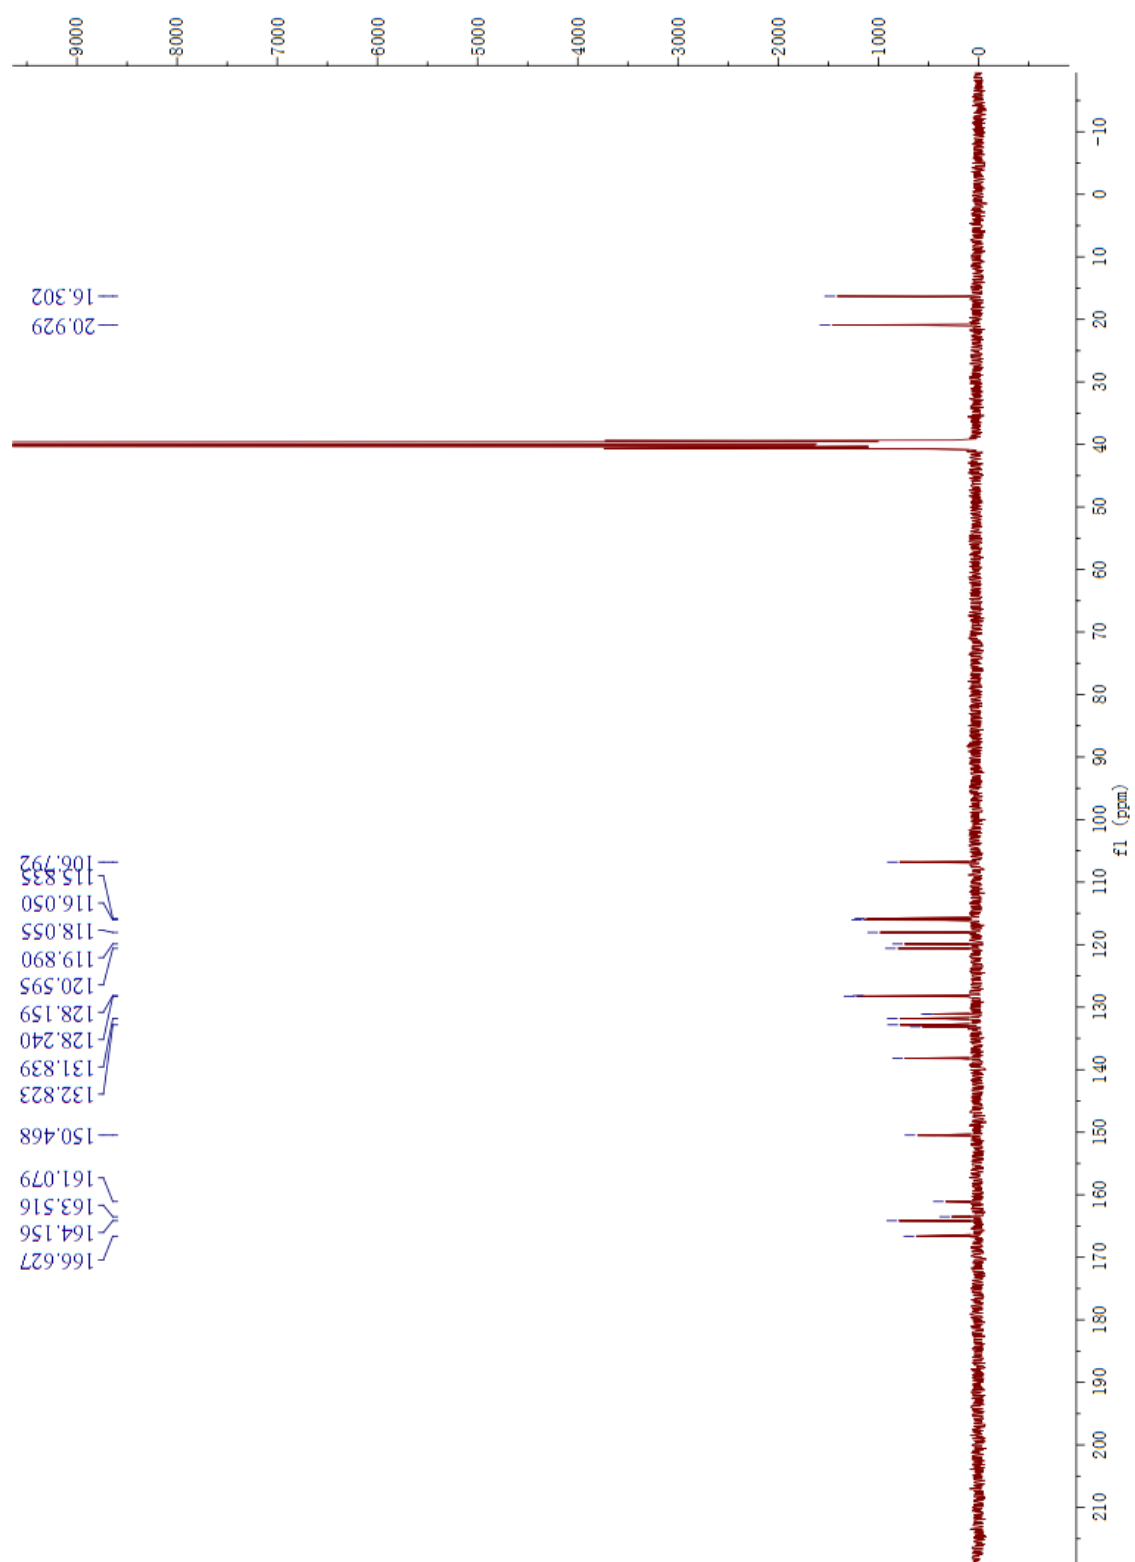

**Figure S 20:**  $^{13}\text{C}$  NMR of Compound **6j**

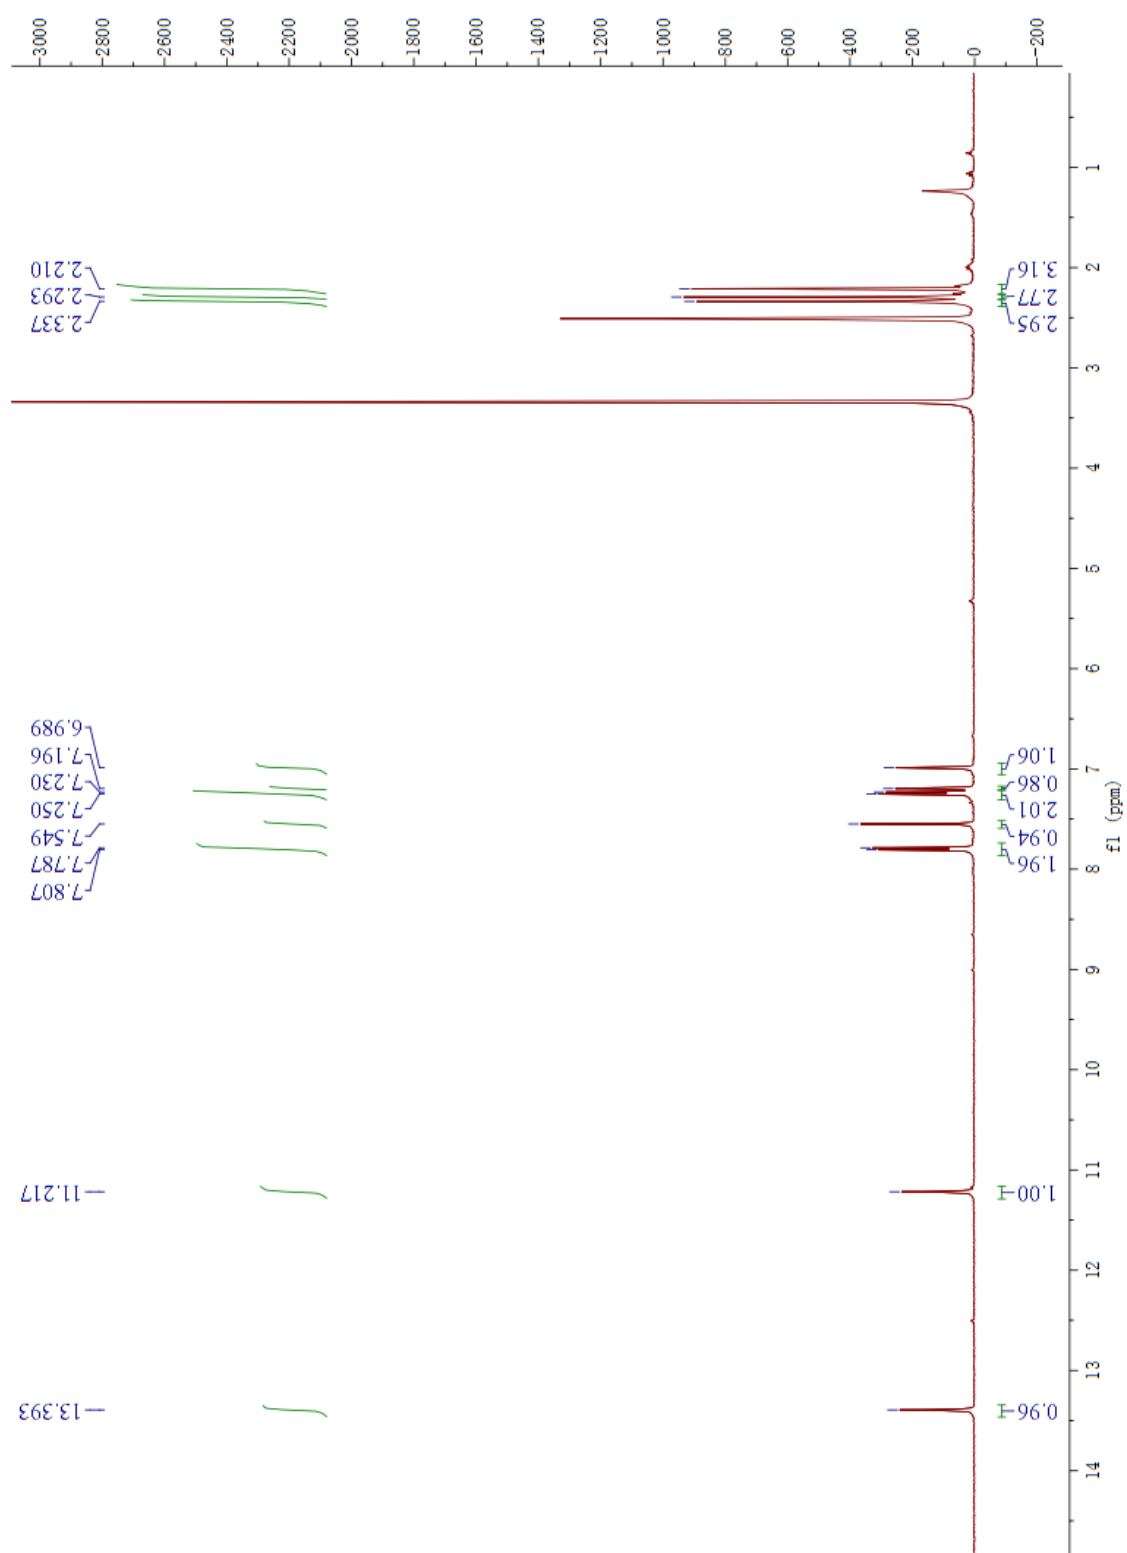

**Figure S 21:** <sup>1</sup>H NMR of Compound **6k**

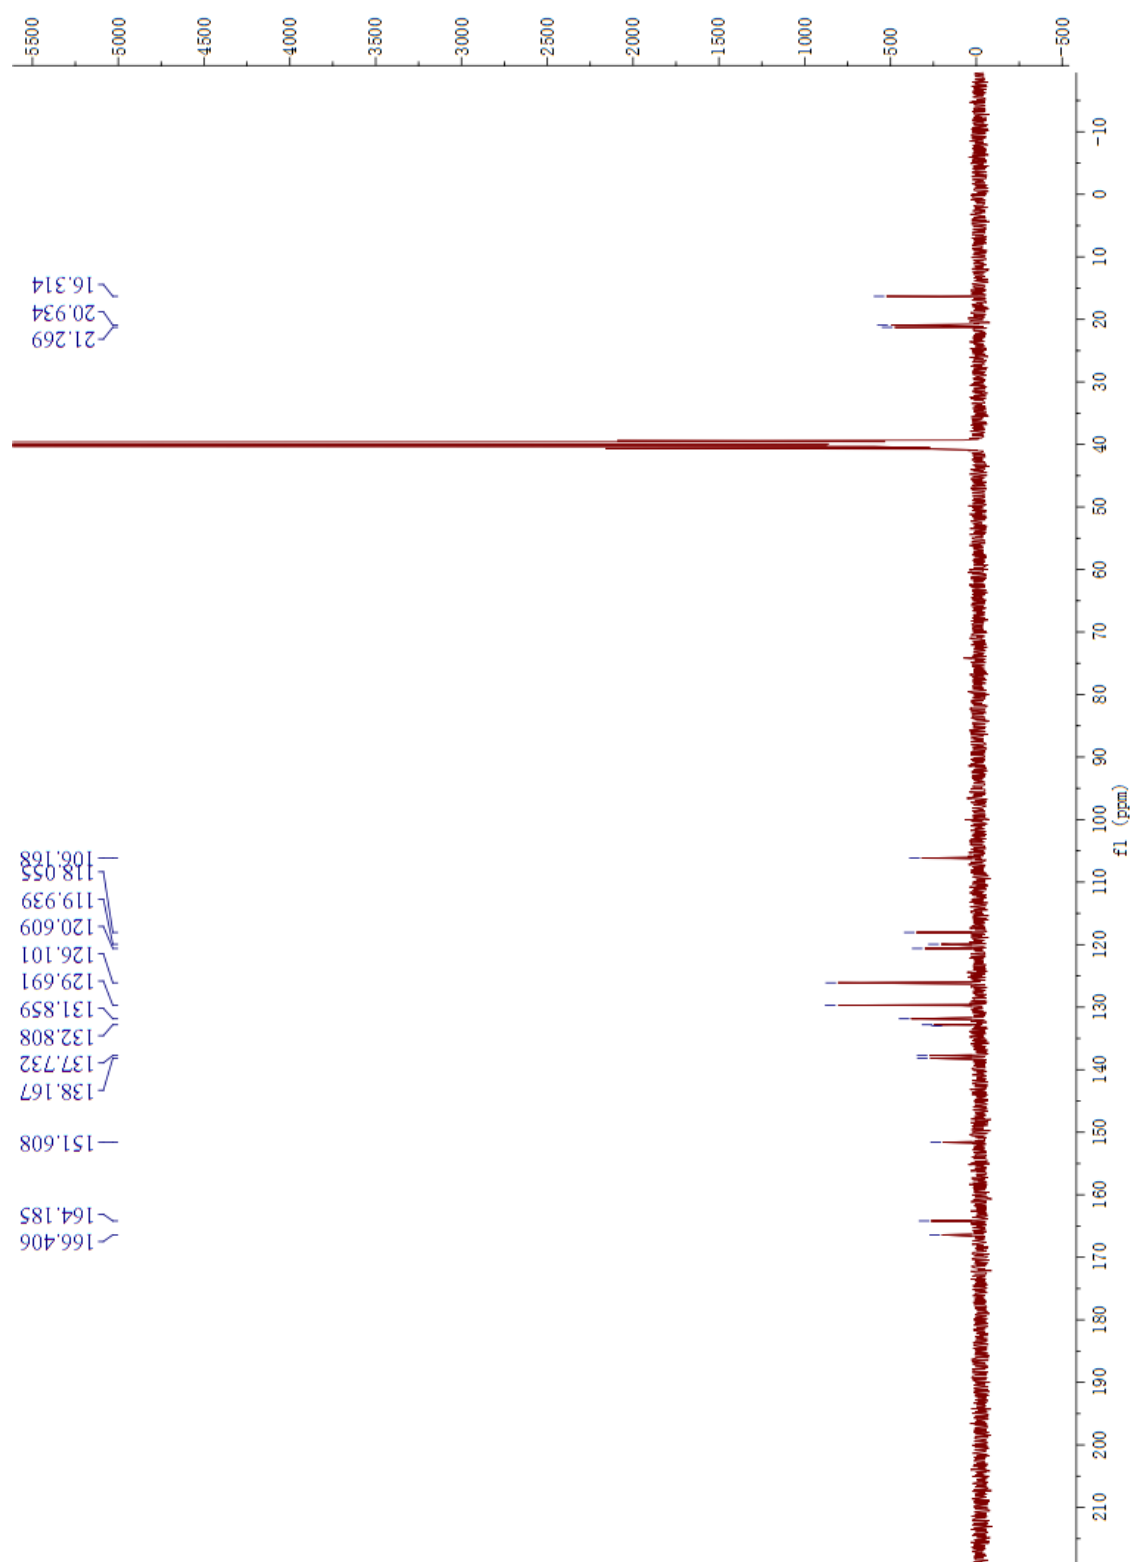

**Figure S 22:**  $^{13}\text{C}$  NMR of Compound **6k**

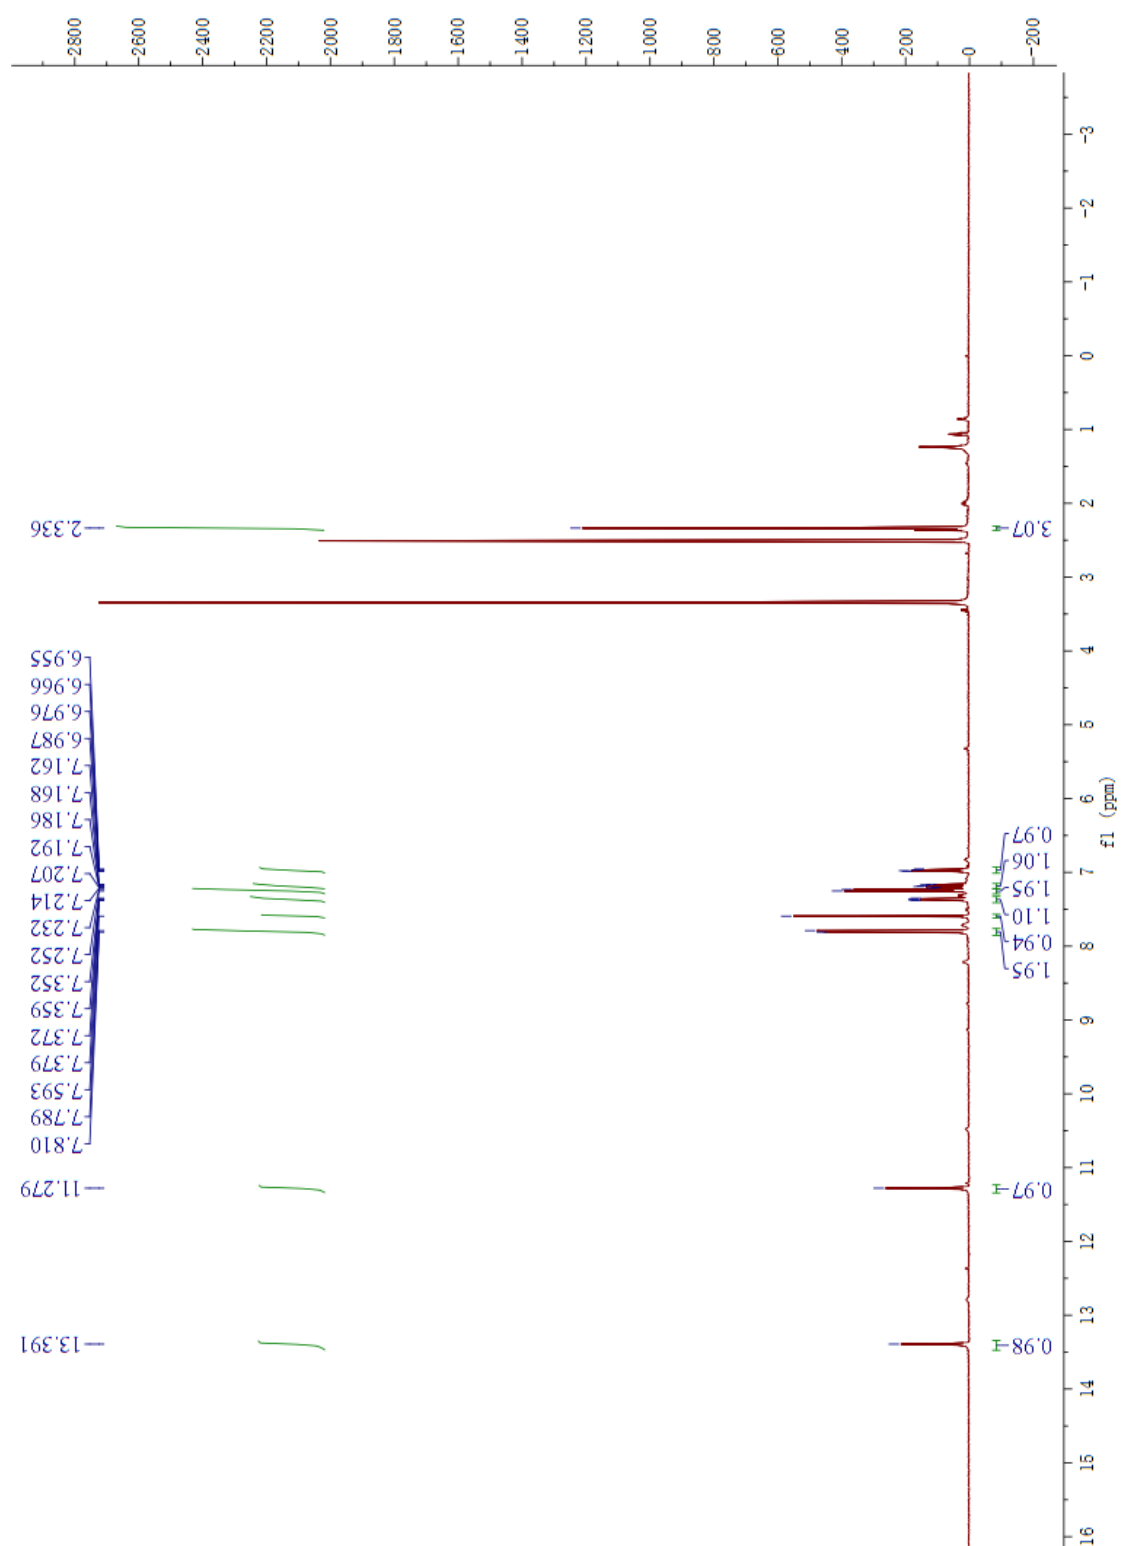

**Figure S 23:**  $^1\text{H}$  NMR of Compound **6l**

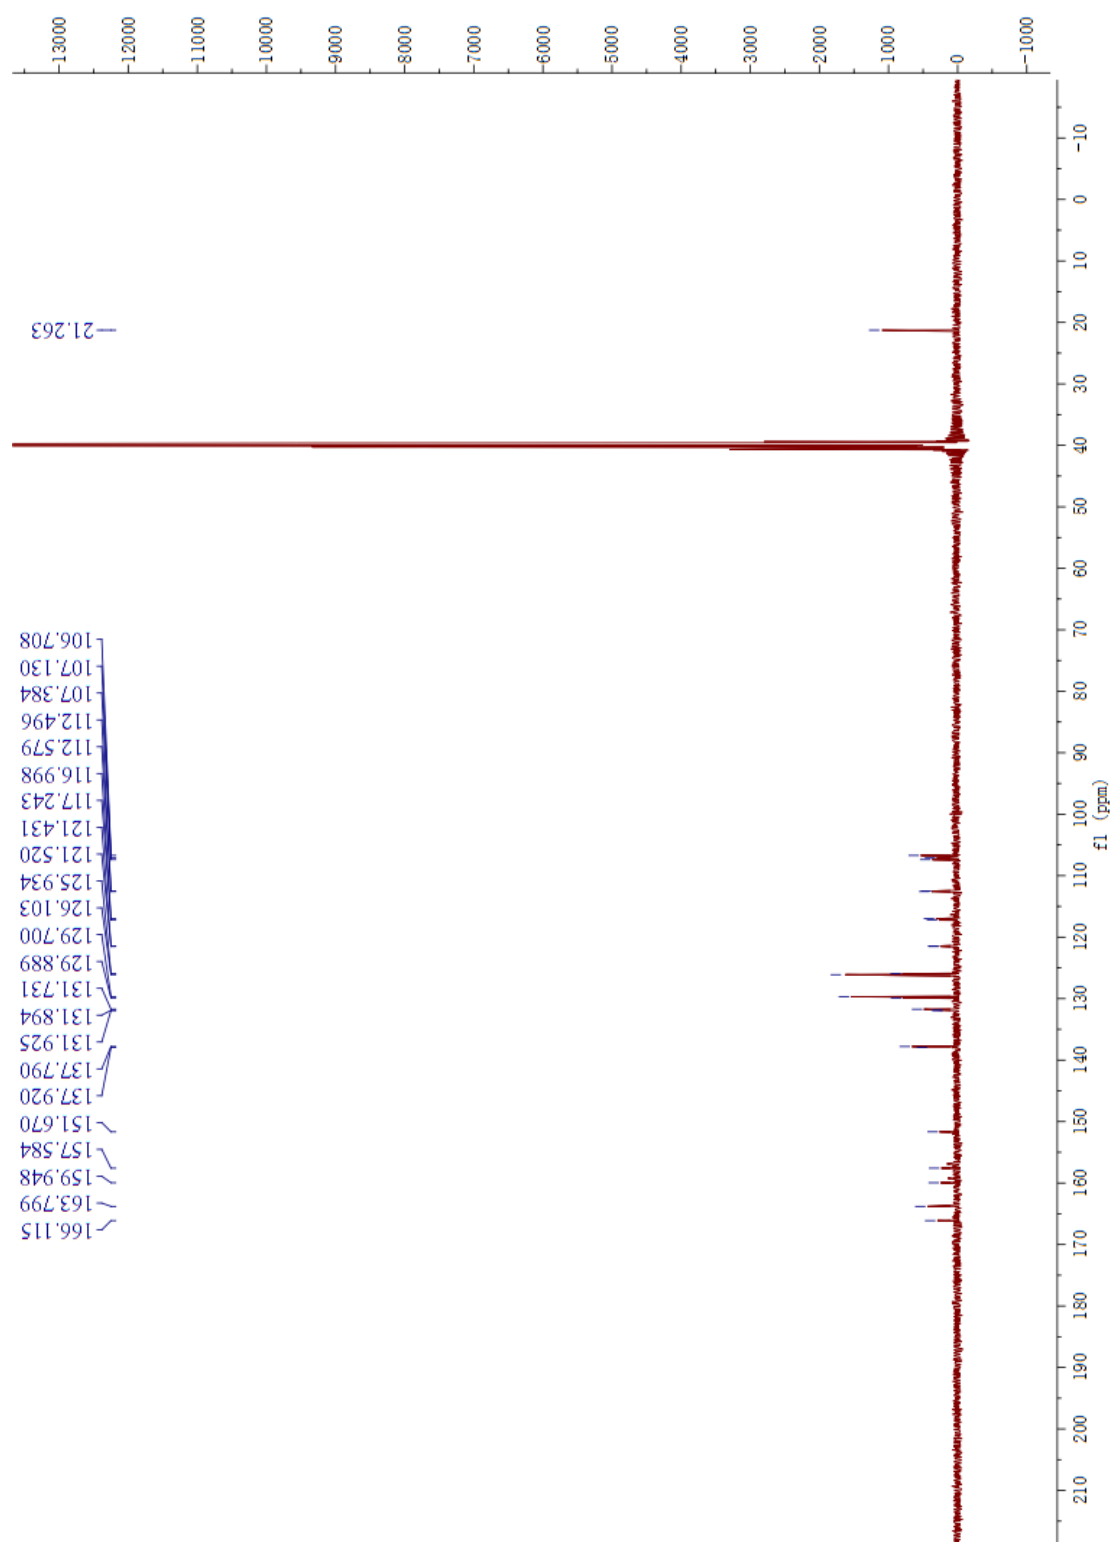

**Figure S 24:** <sup>13</sup>C NMR of Compound 6l

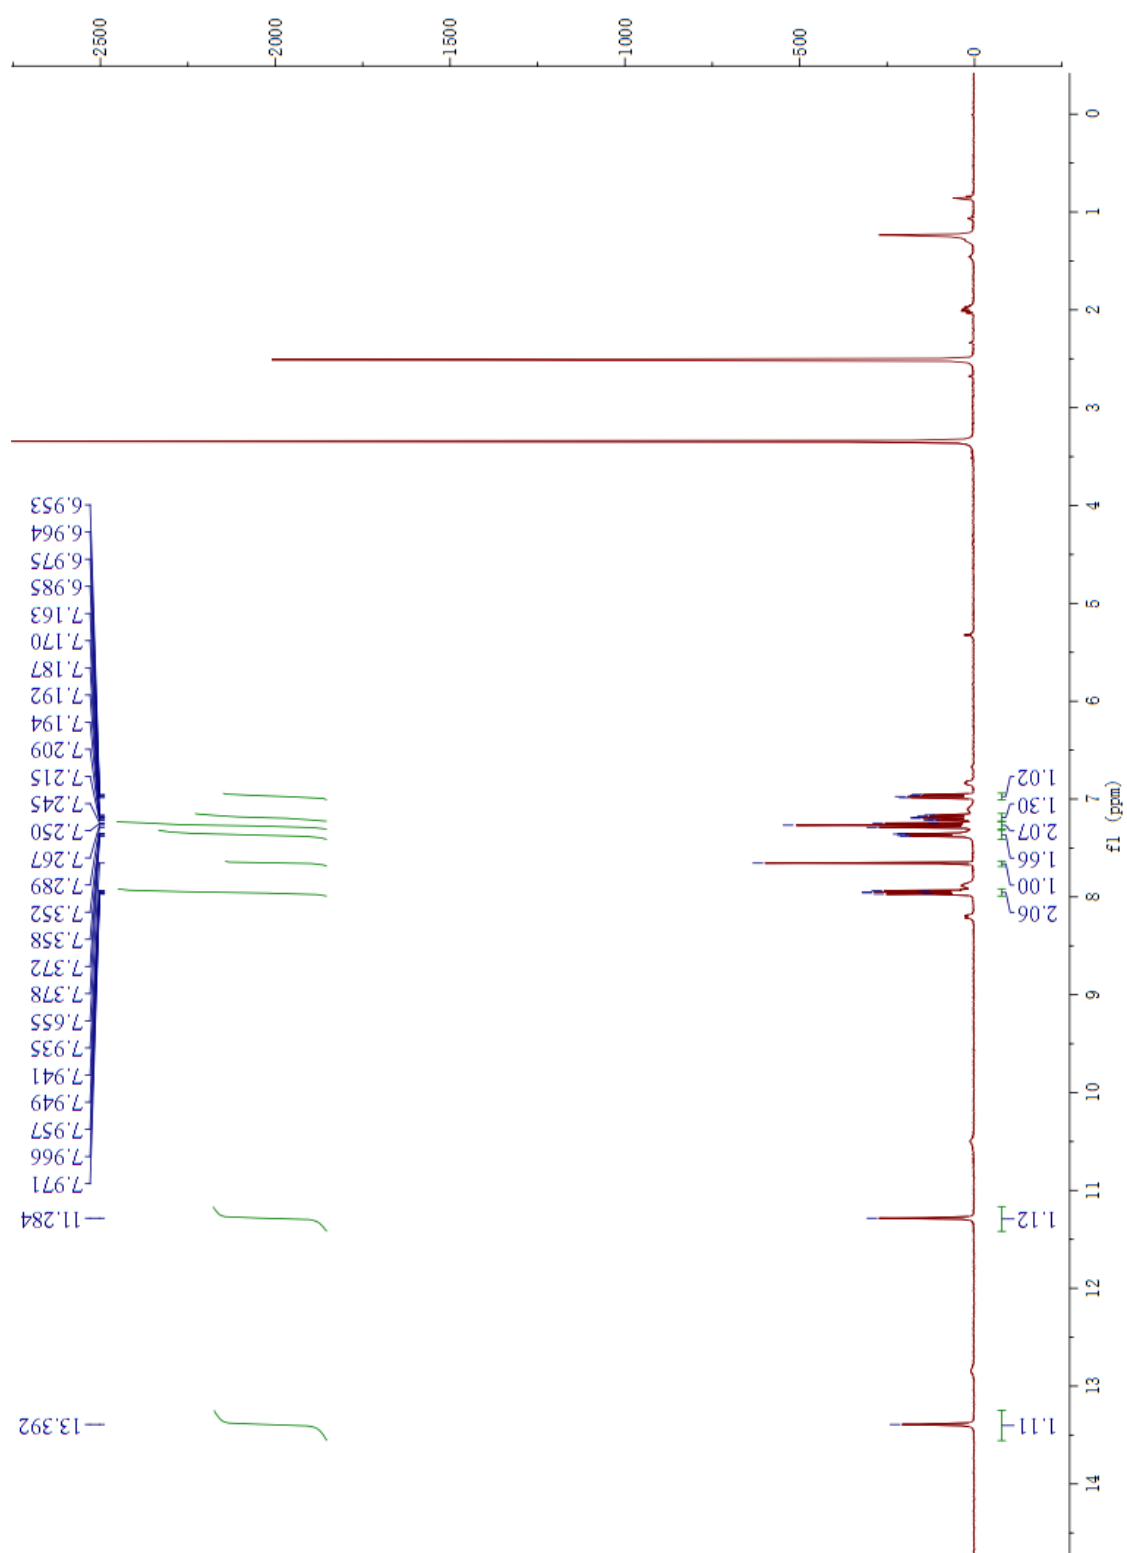

**Figure S 25:** <sup>1</sup>H NMR of Compound 6m

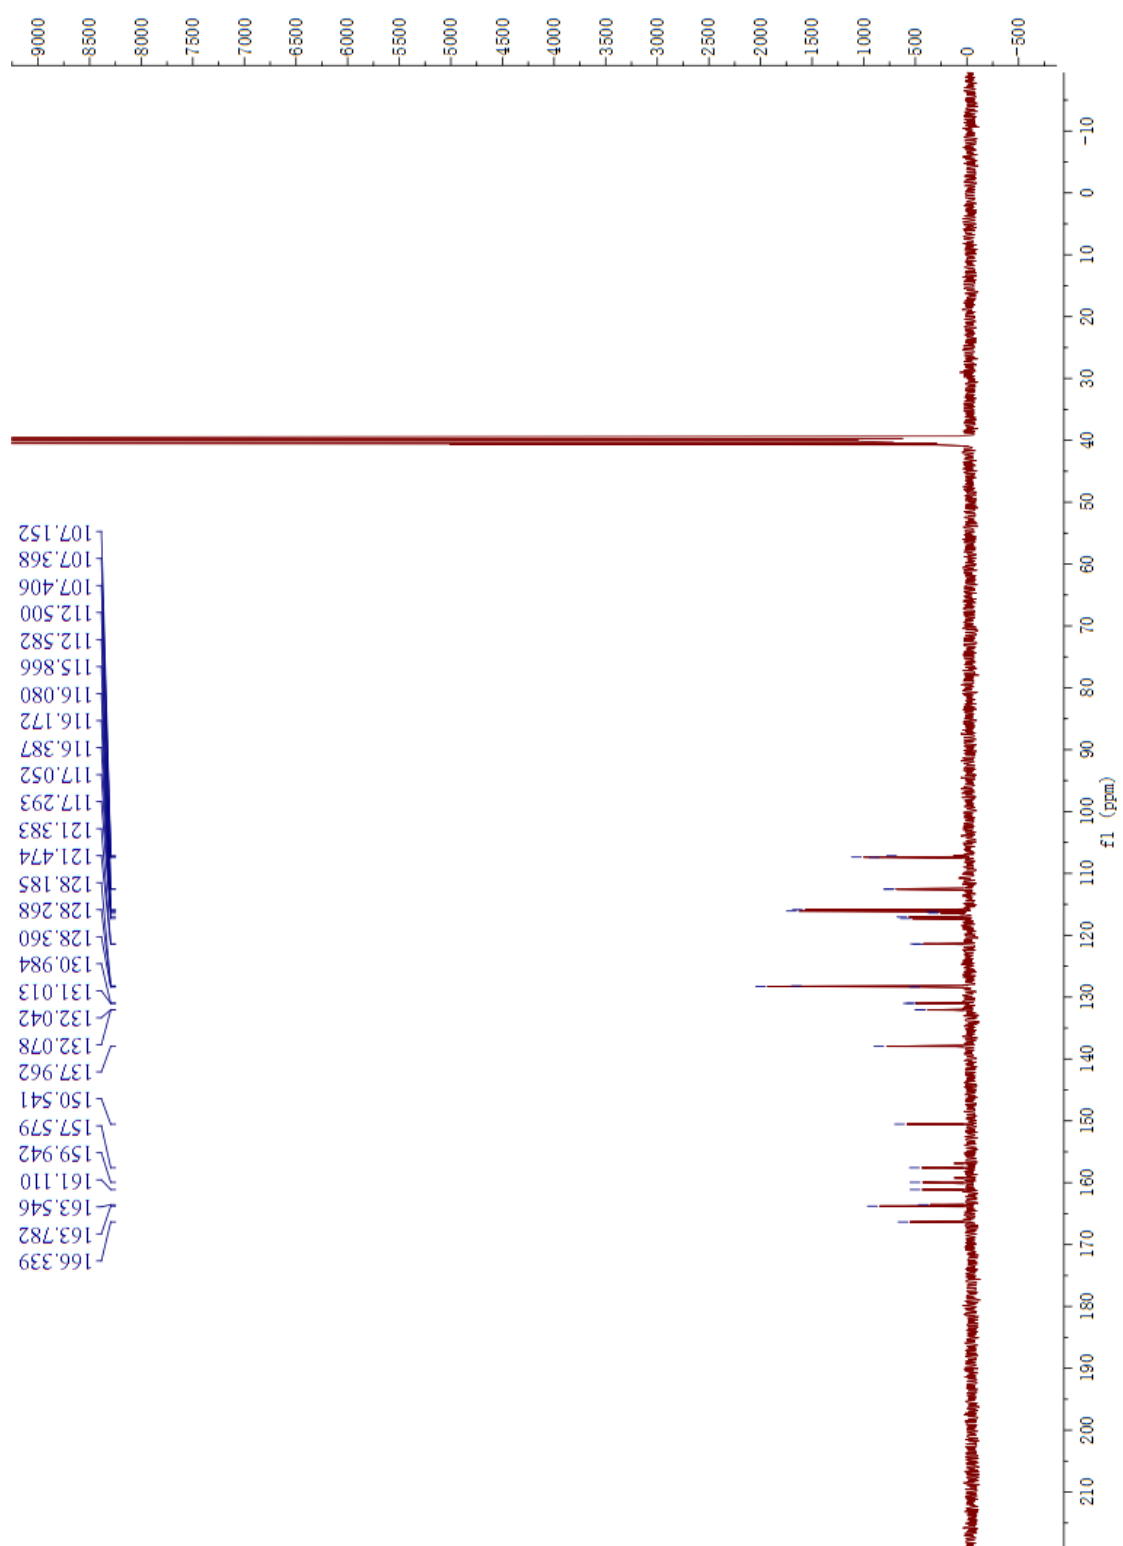

**Figure S 26:** <sup>13</sup>C NMR of Compound 6m

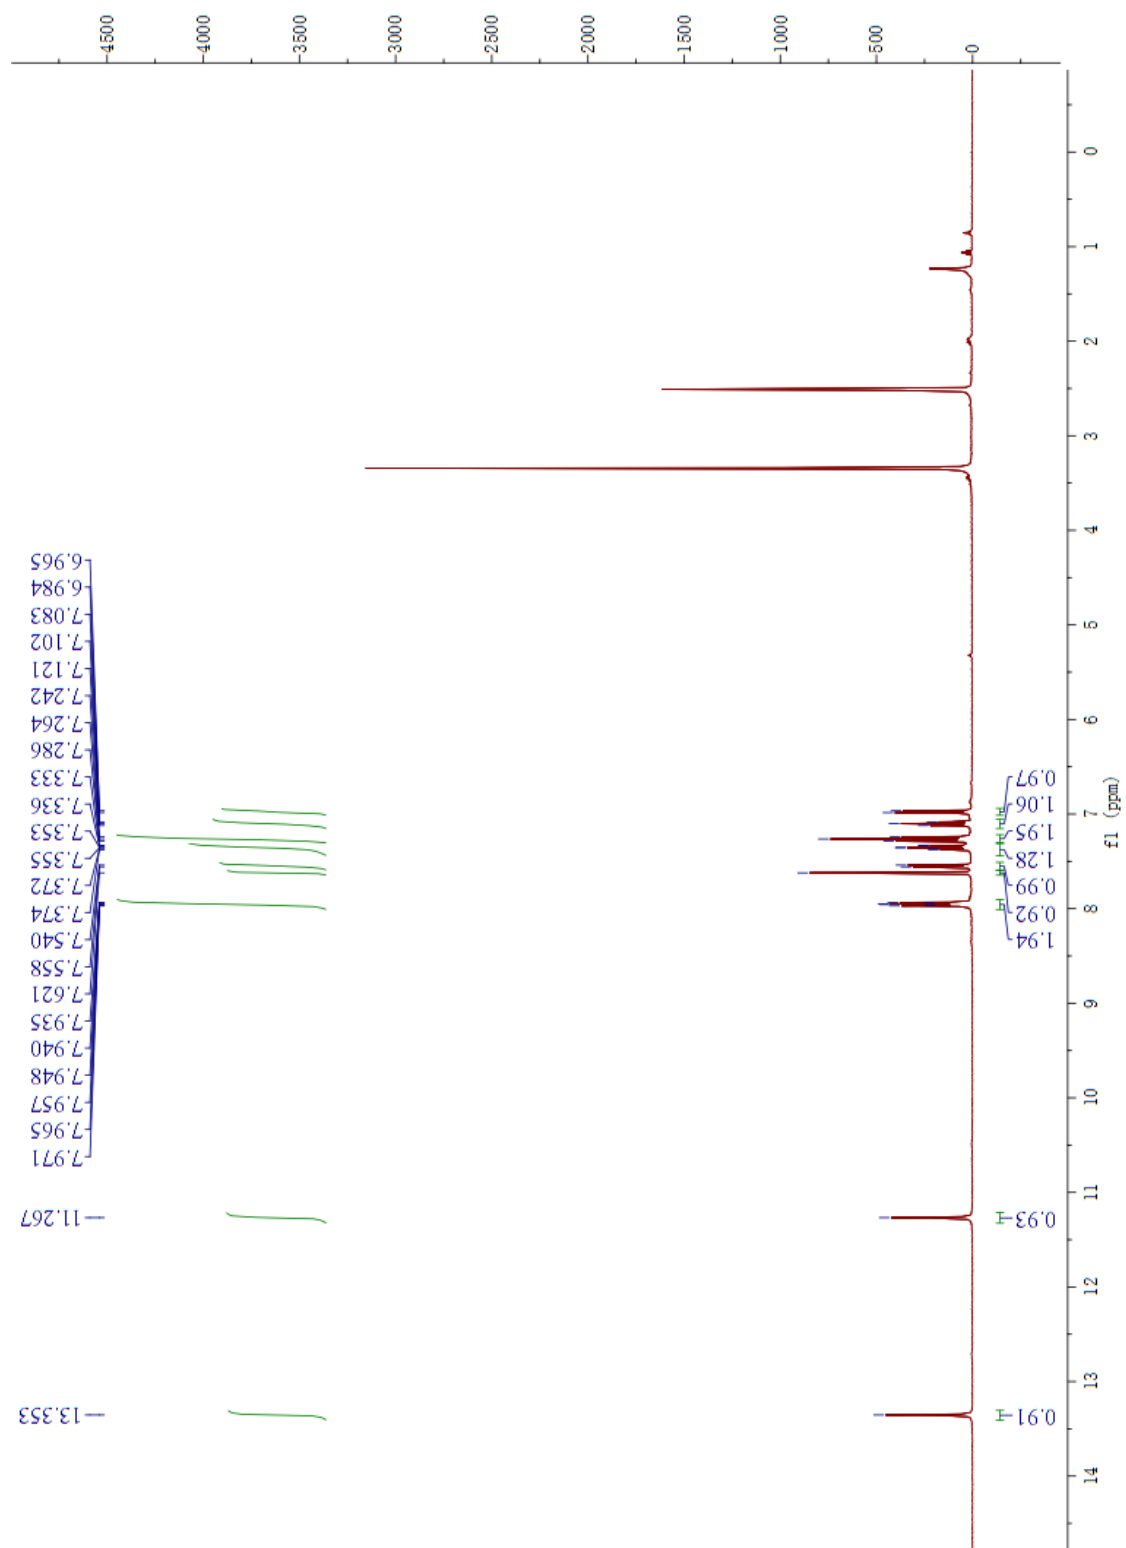

**Figure S 27:** <sup>1</sup>H NMR of Compound **6n**

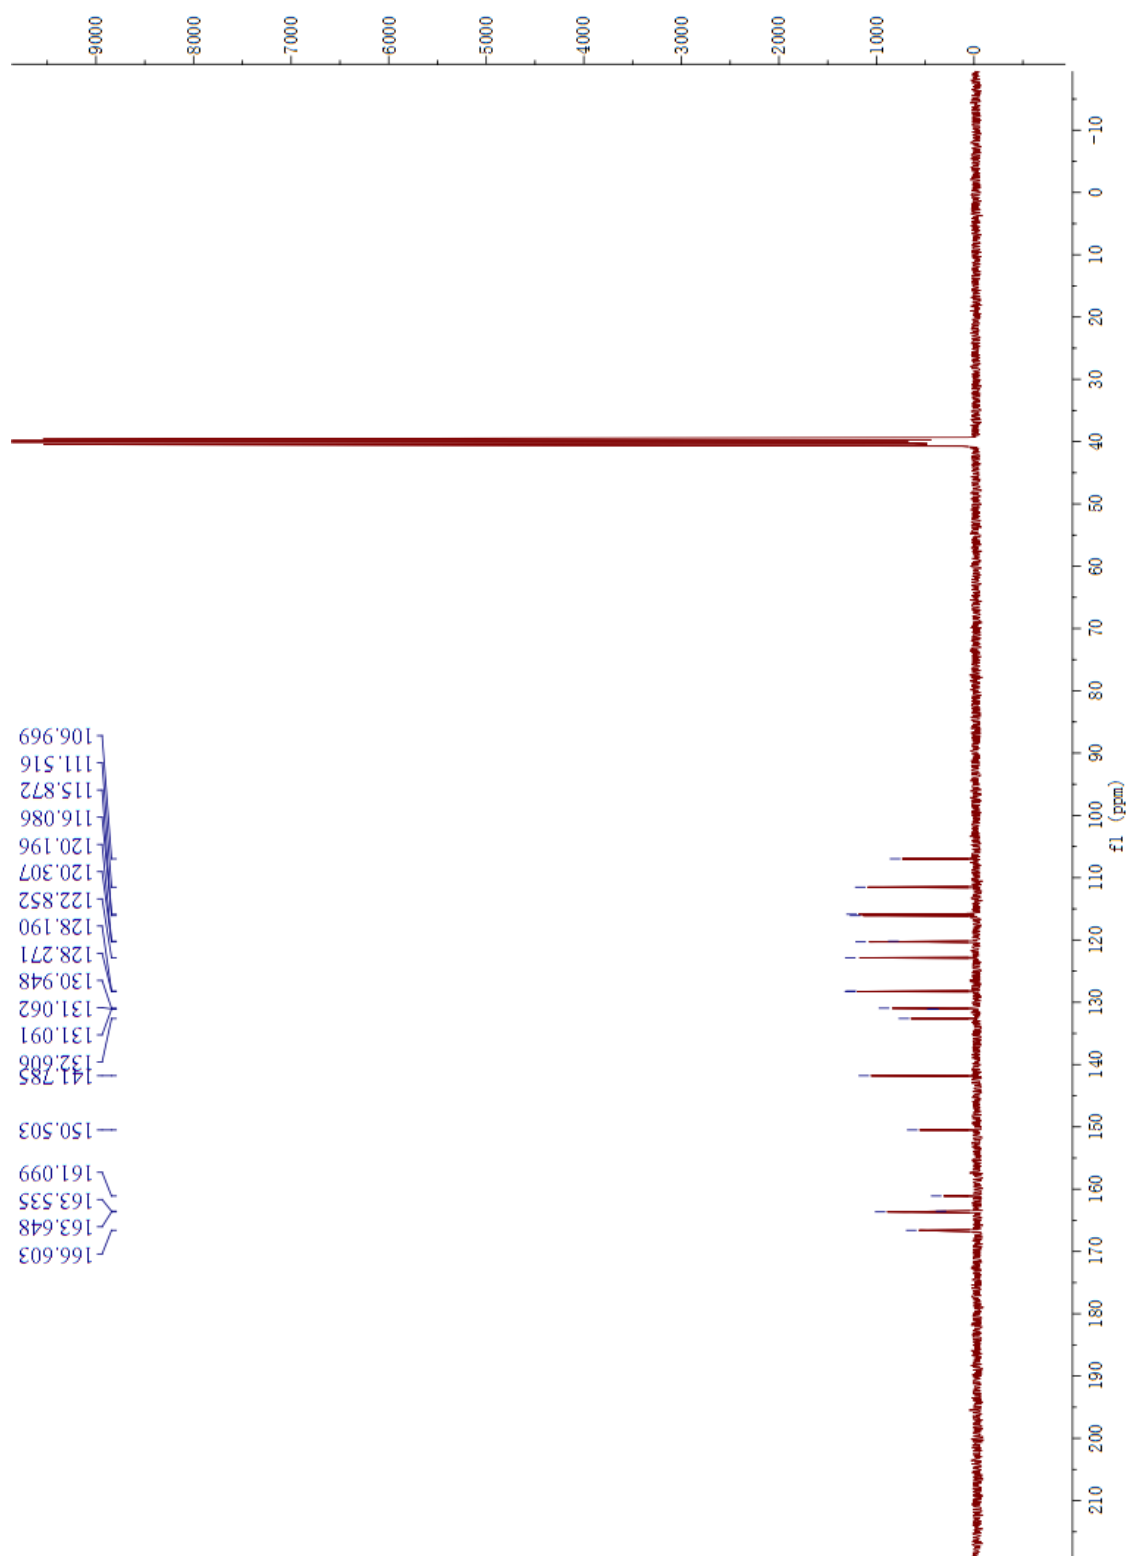

**Figure S 28:**  $^{13}\text{C}$  NMR of Compound **6n**

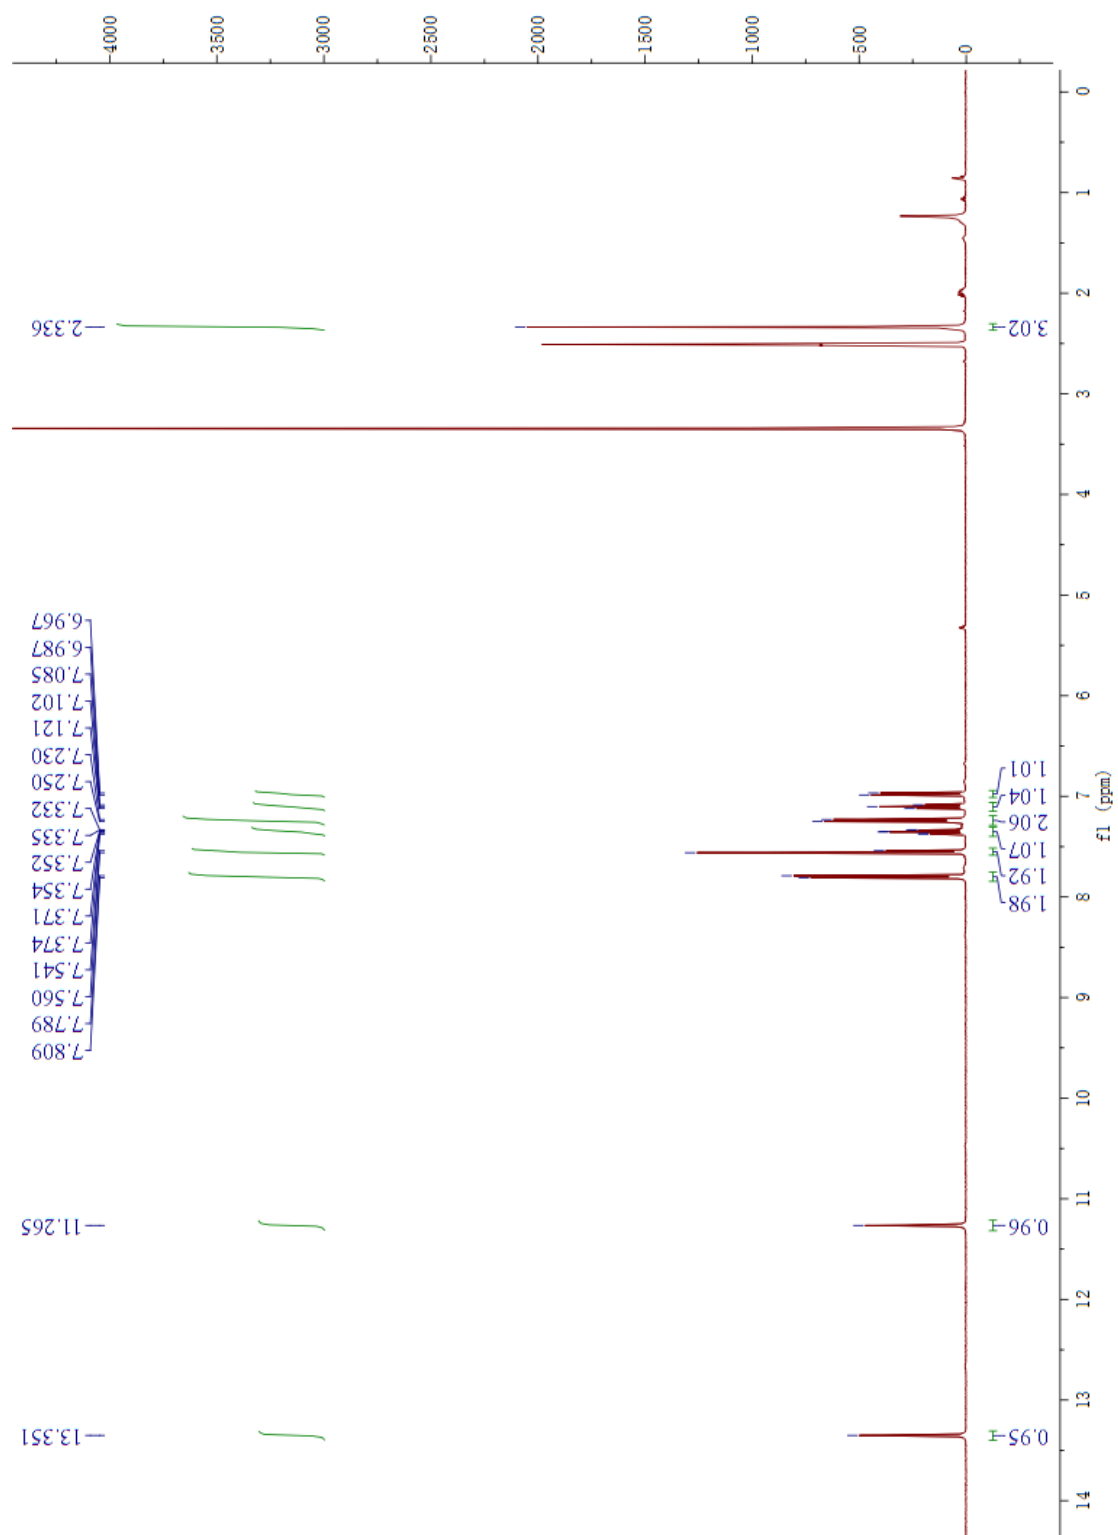

**Figure S 29:** <sup>1</sup>H NMR of Compound 60

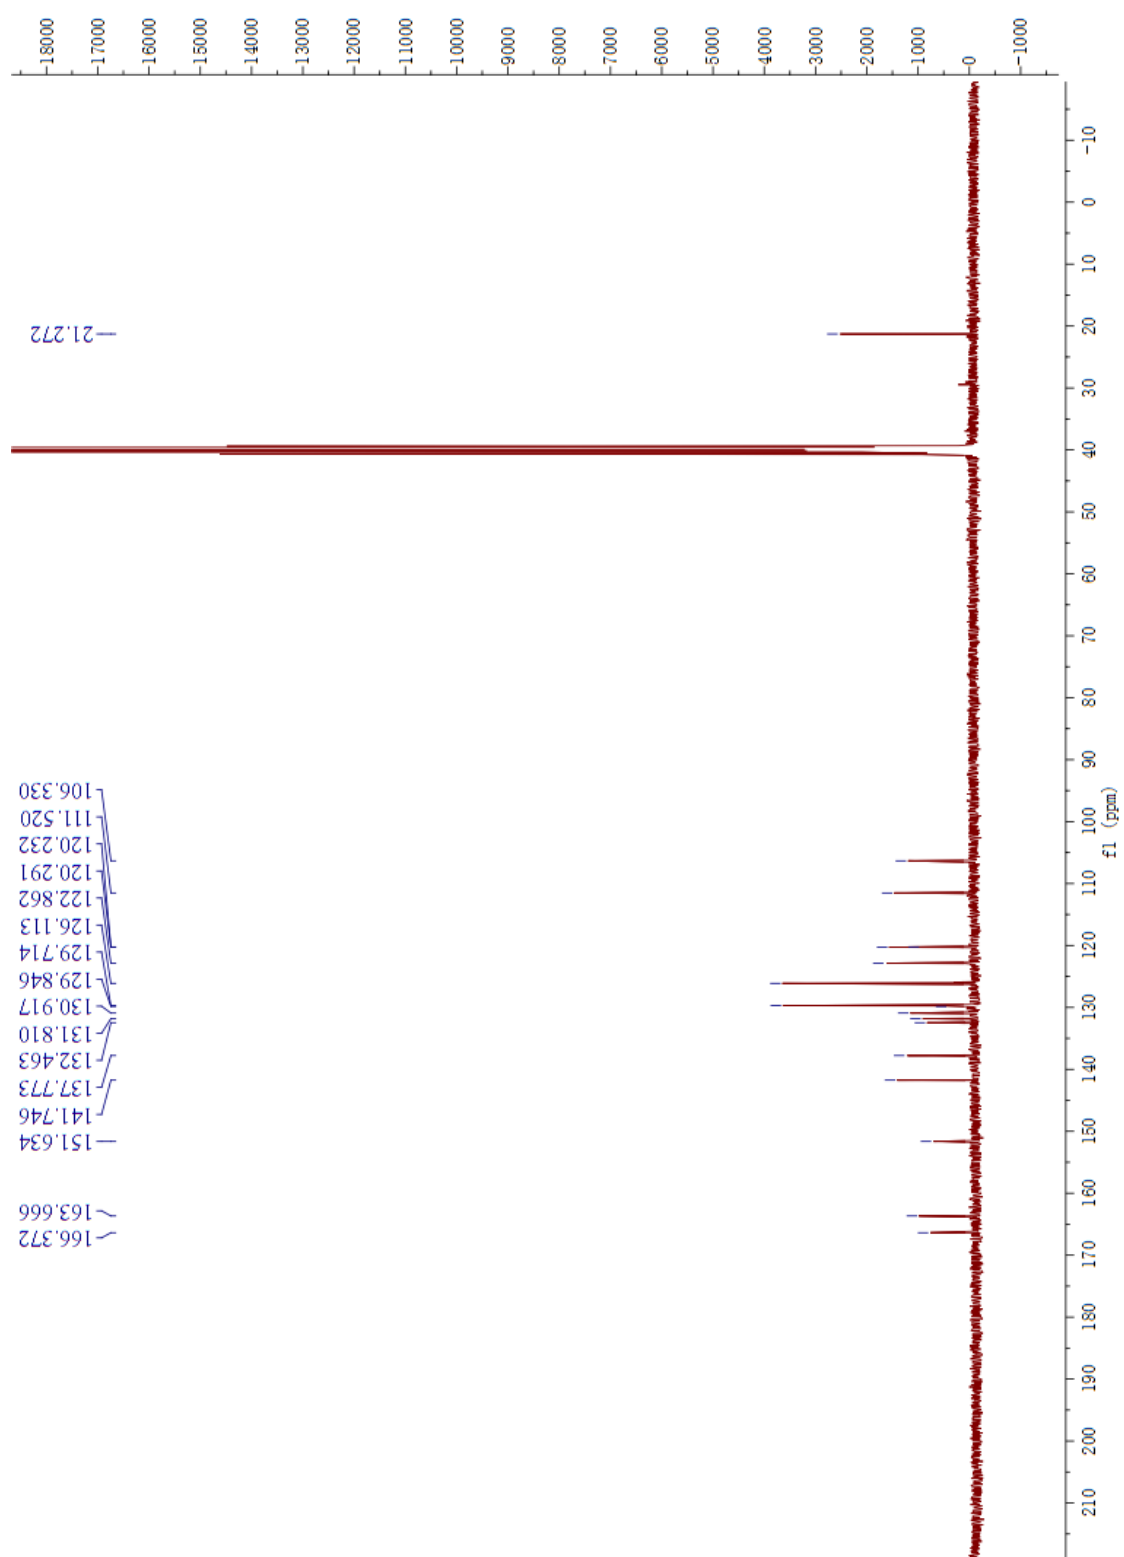

**Figure S 30:**  $^{13}\text{C}$  NMR of Compound **6o**

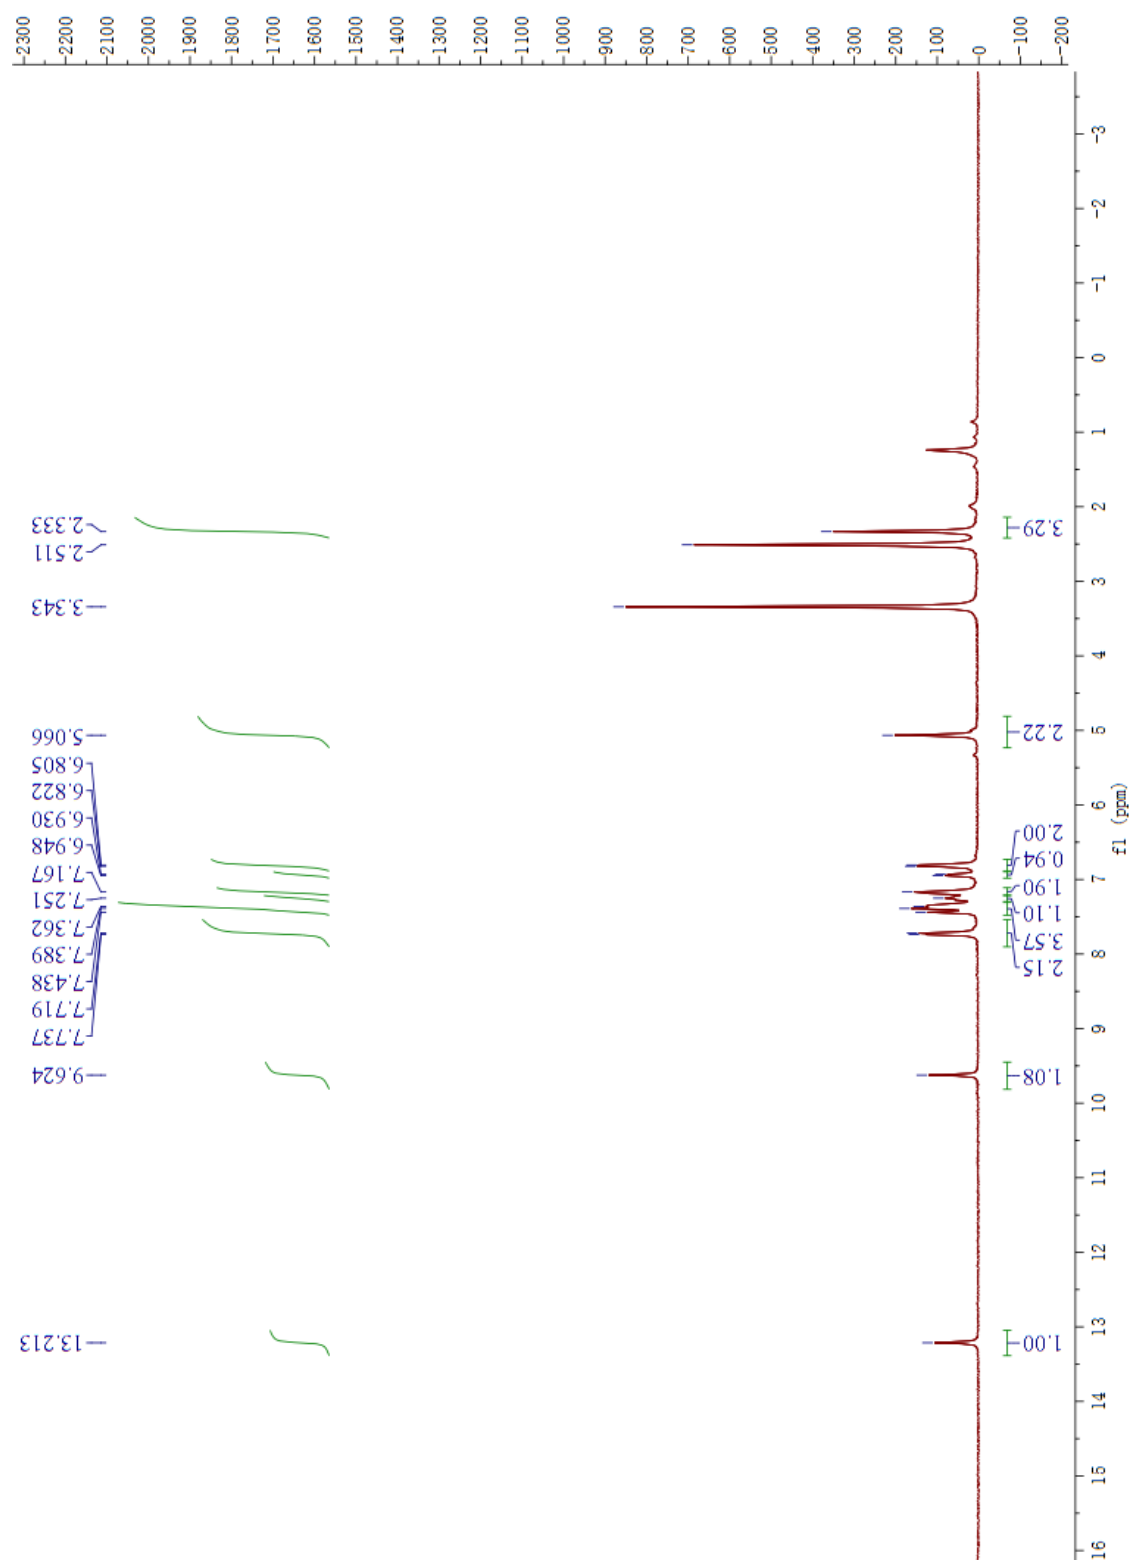

**Figure S 31:** <sup>1</sup>H NMR of Compound **6p**

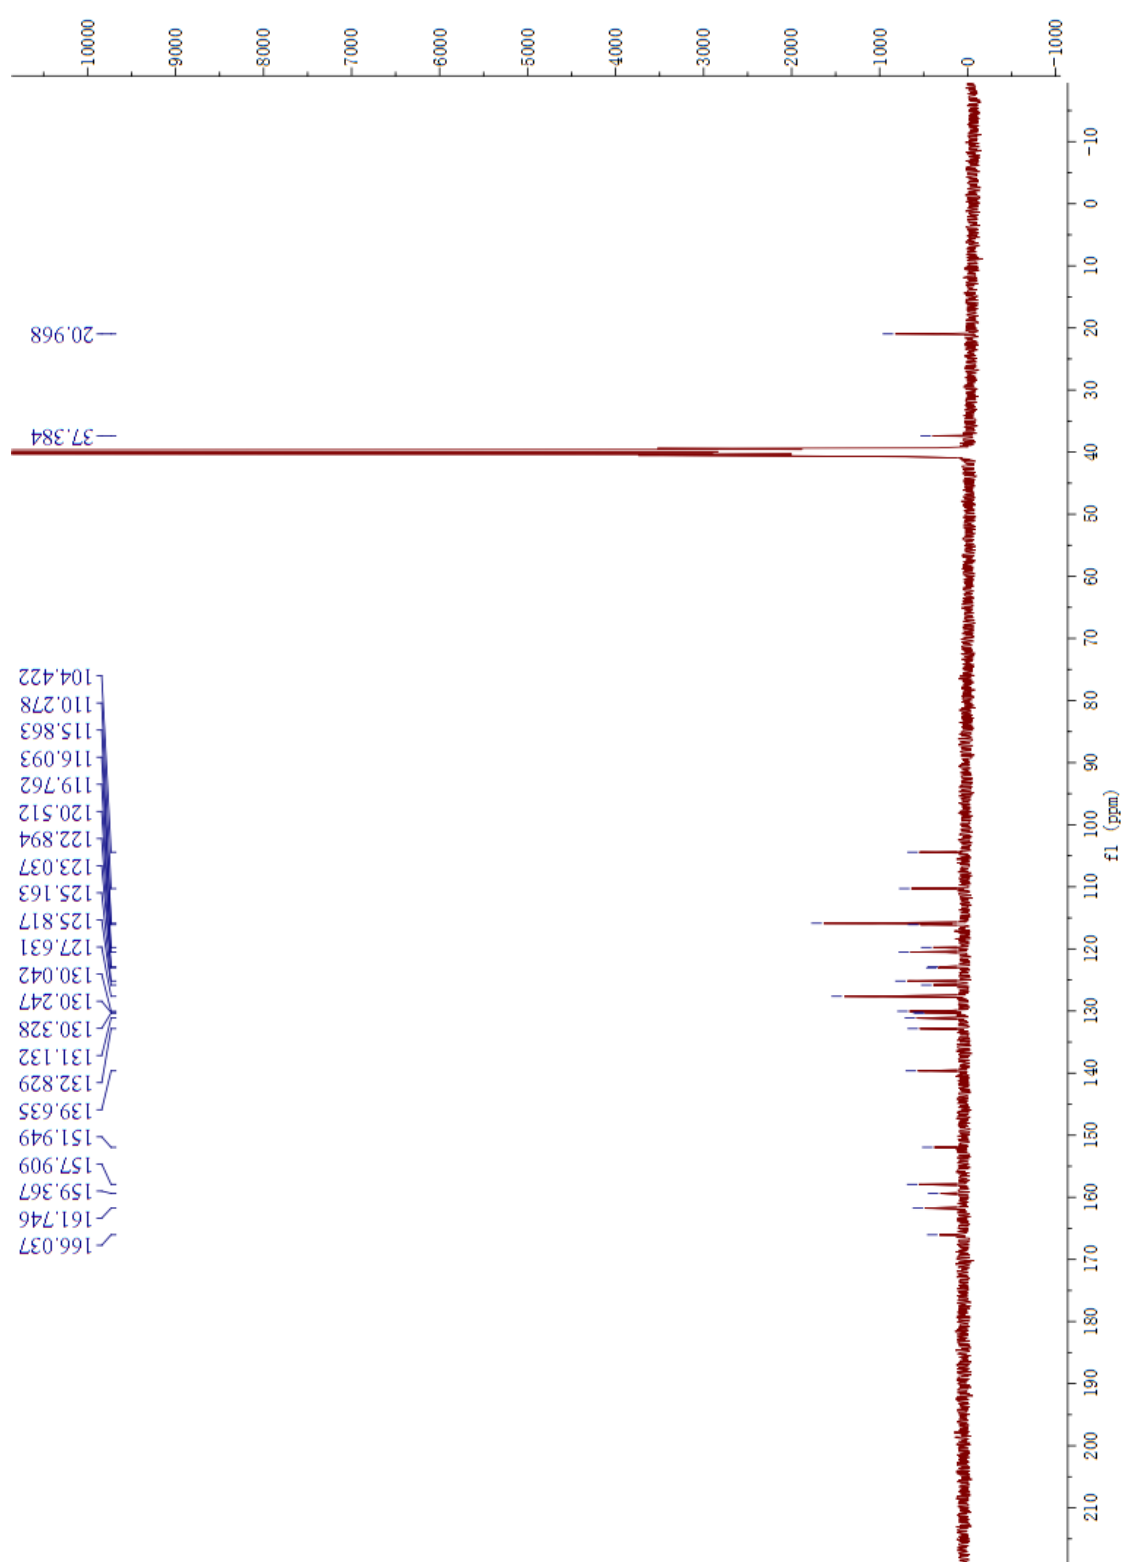

**Figure S 32:**  $^{13}\text{C}$  NMR of Compound 6p
